# Supplementary material for: The colour of an avifauna: A quantitative analysis of the colour of Australian birds
Source: PubMed Central journal article supplement (PMC4683462; doi:10.1038/srep18514), 2015-12-18
Supplement: srep18514-s1.pdf [file srep18514-s1.pdf]

## Supplementary Information

### The colour of an avifauna: a quantitative analysis of the colour of Australian birds

Kaspar Delhey – Monash University, Australia

#### Table of Contents (click to follow link)

|                                                   |    |
|---------------------------------------------------|----|
| Plumage patches.....                              | 2  |
| Figure S1.....                                    | 2  |
| List of species.....                              | 3  |
| Table S1.....                                     | 3  |
| 3D grid in visual space.....                      | 16 |
| Figure S2.....                                    | 16 |
| Examples of reflectance spectra.....              | 17 |
| Figure S3.....                                    | 17 |
| Figure S4.....                                    | 18 |
| Figure S5.....                                    | 19 |
| Figure S6.....                                    | 20 |
| Figure S7.....                                    | 21 |
| Figure S8.....                                    | 22 |
| Summary of results for V-type visual systems..... | 23 |
| Table S2.....                                     | 23 |
| Table S3.....                                     | 25 |
| Table S4.....                                     | 26 |

## Plumage patches

**Figure S1.** Plumage patches measured in this study. Drawing by the author.

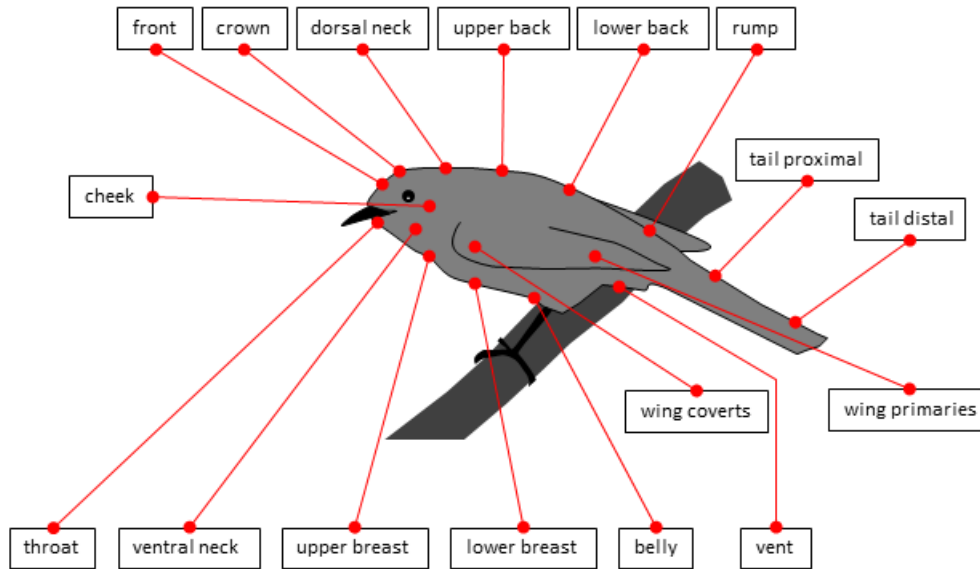

## List of species

**Table S1.** List of species included in this study, including number of female and male specimens measured per species. Taxonomy follows Christidis and Boles (2008).

| Scientific name                      | English name              | order           | family            | female<br>s | males |
|--------------------------------------|---------------------------|-----------------|-------------------|-------------|-------|
| <i>Acanthiza apicalis</i>            | Inland Thornbill          | PASSERIFORMES   | Acanthizidae      | 3           | 3     |
| <i>Acanthiza chrysorrhoa</i>         | Yellow-rumped Thornbill   | PASSERIFORMES   | Acanthizidae      | 3           | 3     |
| <i>Acanthiza ewingii</i>             | Tasmanian Thornbill       | PASSERIFORMES   | Acanthizidae      | 1           | 2     |
| <i>Acanthiza inornata</i>            | Western Thornbill         | PASSERIFORMES   | Acanthizidae      | 3           | 3     |
| <i>Acanthiza iredalei</i>            | Slender-billed Thornbill  | PASSERIFORMES   | Acanthizidae      | 3           | 1     |
| <i>Acanthiza katherina</i>           | Mountain Thornbill        | PASSERIFORMES   | Acanthizidae      | 2           | 2     |
| <i>Acanthiza lineata</i>             | Striated Thornbill        | PASSERIFORMES   | Acanthizidae      | 3           | 3     |
| <i>Acanthornis magna</i>             | Scrubtit                  | PASSERIFORMES   | Acanthizidae      | 1           | 1     |
| <i>Acanthiza nana</i>                | Yellow Thornbill          | PASSERIFORMES   | Acanthizidae      | 2           | 3     |
| <i>Acanthiza pusilla</i>             | Brown Thornbill           | PASSERIFORMES   | Acanthizidae      | 3           | 3     |
| <i>Acanthiza reguloides</i>          | Buff-rumped Thornbill     | PASSERIFORMES   | Acanthizidae      | 3           | 3     |
| <i>Acanthiza robustirostris</i>      | Slaty-backed Thornbill    | PASSERIFORMES   | Acanthizidae      | 1           | 1     |
| <i>Acanthagenys rufogularis</i>      | Spiny-cheeked Honeyeater  | PASSERIFORMES   | Meliphagidae      | 3           | 3     |
| <i>Acanthorhynchus superciliosus</i> | Western Spinebill         | PASSERIFORMES   | Meliphagidae      | 3           | 3     |
| <i>Acanthorhynchus tenuirostris</i>  | Eastern Spinebill         | PASSERIFORMES   | Meliphagidae      | 3           | 3     |
| <i>Acanthiza uropygialis</i>         | Chestnut-rumped Thornbill | PASSERIFORMES   | Acanthizidae      | 3           | 3     |
| <i>Accipiter cirrocephalus</i>       | Collared Sparrowhawk      | ACCIPITRIFORMES | Accipitridae      | 3           | 3     |
| <i>Accipiter fasciatus</i>           | Brown Goshawk             | ACCIPITRIFORMES | Accipitridae      | 3           | 3     |
| <i>Accipiter novaehollandiae</i>     | Grey Goshawk              | ACCIPITRIFORMES | Accipitridae      | 2           | 2     |
| <i>Acrocephalus australis</i>        | Australian Reed-Warbler   | PASSERIFORMES   | Acrocephalidae    | 1           | 3     |
| <i>Aegotheles cristatus</i>          | Australian Owlet-nightjar | APODIFORMES     | Aegothelidae      | 3           | 3     |
| <i>Aerodramus terraereginae</i>      | Australian Swiftlet       | APODIFORMES     | Apodidae          | 3           | 3     |
| <i>Ailuroedus crassirostris</i>      | Green Catbird             | PASSERIFORMES   | Ptilonorhynchidae | 2           | 3     |
| <i>Ailuroedus melanotis</i>          | Spotted Catbird           | PASSERIFORMES   | Ptilonorhynchidae | 3           | 3     |
| <i>Alectura lathami</i>              | Australian Brush-turkey   | GALLIFORMES     | Megapodiidae      | 2           | 2     |
| <i>Alisterus scapularis</i>          | Australian King-Parrot    | PSITTACIFORMES  | Psittacidae       | 3           | 3     |
| <i>Amaurornis moluccana</i>          | Pale-vented Bush-hen      | GRUIFORMES      | Rallidae          | 1           | 2     |
| <i>Amblyornis newtonianus</i>        | Golden Bowerbird          | PASSERIFORMES   | Ptilonorhynchidae | 3           | 3     |
| <i>Amytornis ballarae</i>            | Kalkadoon Grasswren       | PASSERIFORMES   | Maluridae         | 3           | 3     |
| <i>Amytornis barbatus</i>            | Grey Grasswren            | PASSERIFORMES   | Maluridae         | 2           | 3     |
| <i>Amytornis dorotheae</i>           | Carpentarian Grasswren    | PASSERIFORMES   | Maluridae         | 5           | 5     |
| <i>Amytornis goyderi</i>             | Eyrean Grasswren          | PASSERIFORMES   | Maluridae         | 3           | 6     |
| <i>Amytornis housei</i>              | Black Grasswren           | PASSERIFORMES   | Maluridae         | 1           | 1     |
| <i>Amytornis merrotsyi</i>           | Short-tailed Grasswren    | PASSERIFORMES   | Maluridae         | 3           | 2     |
| <i>Amytornis purnelli</i>            | Dusky Grasswren           | PASSERIFORMES   | Maluridae         | 3           | 3     |
| <i>Amytornis striatus</i>            | Striated Grasswren        | PASSERIFORMES   | Maluridae         | 2           | 3     |
| <i>Amytornis textilis</i>            | Thick-billed Grasswren    | PASSERIFORMES   | Maluridae         | 3           | 3     |
| <i>Amytornis woodwardi</i>           | White-throated Grasswren  | PASSERIFORMES   | Maluridae         | 2           | 3     |
| <i>Anas castanea</i>                 | Chestnut Teal             | ANSERIFORMES    | Anatidae          | 3           | 3     |

|                                   |                             |                      |                  |   |   |
|-----------------------------------|-----------------------------|----------------------|------------------|---|---|
| <i>Anas gracilis</i>              | Grey Teal                   | ANSERIFORMES         | Anatidae         | 3 | 3 |
| <i>Anas rhynchotis</i>            | Australasian Shoveler       | ANSERIFORMES         | Anatidae         | 3 | 2 |
| <i>Anas superciliosa</i>          | Pacific Black Duck          | ANSERIFORMES         | Anatidae         | 3 | 3 |
| <i>Anhinga novaehollandiae</i>    | Australasian Darter         | PHALACROCORACIFORMES | Anhingidae       | 3 | 3 |
| <i>Anseranas semipalmata</i>      | Magpie Goose                | ANSERIFORMES         | Anseranatidae    | 3 | 2 |
| <i>Anthochaera carunculata</i>    | Red Wattlebird              | PASSERIFORMES        | Meliphagidae     | 3 | 3 |
| <i>Anthochaera chrysoptera</i>    | Little Wattlebird           | PASSERIFORMES        | Meliphagidae     | 3 | 3 |
| <i>Anthochaera lunulata</i>       | Western Wattlebird          | PASSERIFORMES        | Meliphagidae     | 3 | 2 |
| <i>Anthus novaeseelandiae</i>     | Australasian Pipit          | PASSERIFORMES        | Motacillidae     | 3 | 3 |
| <i>Anthochaera paradoxa</i>       | Yellow Wattlebird           | PASSERIFORMES        | Meliphagidae     | 2 | 3 |
| <i>Anthochaera phrygia</i>        | Regent Honeyeater           | PASSERIFORMES        | Meliphagidae     | 3 | 3 |
| <i>Aphelocephala leucopsis</i>    | Southern Whiteface          | PASSERIFORMES        | Acanthizidae     | 3 | 3 |
| <i>Aphelocephala nigricincta</i>  | Banded Whiteface            | PASSERIFORMES        | Acanthizidae     | 1 | 2 |
| <i>Aphelocephala pectoralis</i>   | Chestnut-breasted Whiteface | PASSERIFORMES        | Acanthizidae     | 1 | 1 |
| <i>Aplonis metallica</i>          | Metallic Starling           | PASSERIFORMES        | Sturnidae        | 3 | 3 |
| <i>Aprosmictus erythropterus</i>  | Red-winged Parrot           | PSITTACIFORMES       | Psittacidae      | 3 | 3 |
| <i>Aquila audax</i>               | Wedge-tailed Eagle          | ACCIPITRIFORMES      | Accipitridae     | 2 | 3 |
| <i>Ardeotis australis</i>         | Australian Bustard          | GRUIFORMES           | Otididae         | 2 | 1 |
| <i>Ardea ibis</i>                 | Cattle Egret                | CICONIIFORMES        | Ardeidae         | 1 | 0 |
| <i>Ardea intermedia</i>           | Intermediate Egret          | CICONIIFORMES        | Ardeidae         | 1 | 3 |
| <i>Ardea pacifica</i>             | White-necked Heron          | CICONIIFORMES        | Ardeidae         | 3 | 1 |
| <i>Arses kaupi</i>                | Pied Monarch                | PASSERIFORMES        | Monarchidae      | 2 | 1 |
| <i>Arses telescopthalmus</i>      | Frilled Monarch             | PASSERIFORMES        | Monarchidae      | 3 | 1 |
| <i>Artamus cinereus</i>           | Black-faced Woodswallow     | PASSERIFORMES        | Artamidae        | 3 | 3 |
| <i>Artamus cyanopterus</i>        | Dusky Woodswallow           | PASSERIFORMES        | Artamidae        | 3 | 3 |
| <i>Artamus leucorhynchus</i>      | White-breasted Woodswallow  | PASSERIFORMES        | Artamidae        | 3 | 1 |
| <i>Artamus minor</i>              | Little Woodswallow          | PASSERIFORMES        | Artamidae        | 3 | 3 |
| <i>Artamus personatus</i>         | Masked Woodswallow          | PASSERIFORMES        | Artamidae        | 3 | 3 |
| <i>Artamus superciliosus</i>      | White-browed Woodswallow    | PASSERIFORMES        | Artamidae        | 3 | 3 |
| <i>Ashbyia lovensis</i>           | Gibberbird                  | PASSERIFORMES        | Meliphagidae     | 3 | 1 |
| <i>Atrichornis clamosus</i>       | Noisy Scrub-bird            | PASSERIFORMES        | Atrichornithidae | 0 | 1 |
| <i>Atrichornis rufescens</i>      | Rufous Scrub-bird           | PASSERIFORMES        | Atrichornithidae | 1 | 3 |
| <i>Aviceda subcristata</i>        | Pacific Baza                | ACCIPITRIFORMES      | Accipitridae     | 2 | 3 |
| <i>Aythya australis</i>           | Hardhead                    | ANSERIFORMES         | Anatidae         | 3 | 3 |
| <i>Barnardius zonarius</i>        | Australian Ringneck         | PSITTACIFORMES       | Psittacidae      | 3 | 3 |
| <i>Biziura lobata</i>             | Musk Duck                   | ANSERIFORMES         | Anatidae         | 2 | 3 |
| <i>Botaurus poiciloptilus</i>     | Australasian Bittern        | CICONIIFORMES        | Ardeidae         | 3 | 3 |
| <i>Burhinus grallarius</i>        | Bush Stone-curlew           | CHARADRIIFORMES      | Burhinidae       | 1 | 1 |
| <i>Butorides striata</i>          | Striated Heron              | CICONIIFORMES        | Ardeidae         | 2 | 3 |
| <i>Cacomantis castaneiventris</i> | Chestnut-breasted Cuckoo    | CUCULIFORMES         | Cuculidae        | 0 | 3 |
| <i>Cacomantis flabelliformis</i>  | Fan-tailed Cuckoo           | CUCULIFORMES         | Cuculidae        | 3 | 3 |
| <i>Cacatua galerita</i>           | Sulphur-crested Cockatoo    | PSITTACIFORMES       | Cacatuidae       | 3 | 1 |
| <i>Cacomantis pallidus</i>        | Pallid Cuckoo               | CUCULIFORMES         | Cuculidae        | 3 | 3 |
| <i>Cacatua pastinator</i>         | Western Corella             | PSITTACIFORMES       | Cacatuidae       | 2 | 3 |
| <i>Cacatua sanguinea</i>          | Little Corella              | PSITTACIFORMES       | Cacatuidae       | 3 | 3 |
| <i>Cacatua tenuirostris</i>       | Long-billed Corella         | PSITTACIFORMES       | Cacatuidae       | 3 | 3 |

|                                        |                                |                  |                  |   |   |
|----------------------------------------|--------------------------------|------------------|------------------|---|---|
| <i>Cacomantis variolosus</i>           | Brush Cuckoo                   | CUCULIFORMES     | Cuculidae        | 2 | 3 |
| <i>Calyptorhynchus banksii</i>         | Red-tailed Black-Cockatoo      | PSITTACIFORMES   | Cacatuidae       | 3 | 3 |
| <i>Calyptorhynchus baudinii</i>        | Baudin's Black-Cockatoo        | PSITTACIFORMES   | Cacatuidae       | 2 | 2 |
| <i>Calamanthus campestris</i>          | Rufous Fieldwren               | PASSERIFORMES    | Acanthizidae     | 1 | 1 |
| <i>Callocephalon fimbriatum</i>        | Gang-gang Cockatoo             | PSITTACIFORMES   | Cacatuidae       | 3 | 3 |
| <i>Calamanthus fuliginosus</i>         | Striated Fieldwren             | PASSERIFORMES    | Acanthizidae     | 3 | 3 |
| <i>Calyptorhynchus funereus</i>        | Yellow-tailed Black-Cockatoo   | PSITTACIFORMES   | Cacatuidae       | 3 | 2 |
| <i>Calyptorhynchus lathami</i>         | Glossy Black-Cockatoo          | PSITTACIFORMES   | Cacatuidae       | 3 | 3 |
| <i>Calyptorhynchus latirostris</i>     | Carnaby's Black-Cockatoo       | PSITTACIFORMES   | Cacatuidae       | 2 | 3 |
| <i>Caprimulgus macrurus</i>            | Large-tailed Nightjar          | CAPRIMULGIFORMES | Caprimulgidae    | 1 | 2 |
| <i>Carterornis leucotis</i>            | White-eared Monarch            | PASSERIFORMES    | Monarchidae      | 1 | 3 |
| <i>Casuarius casuarius</i>             | Southern Cassowary             | CASUARIIFORMES   | Casuariidae      | 2 | 1 |
| <i>Centropus phasianinus</i>           | Pheasant Coucal                | CUCULIFORMES     | Cuculidae        | 2 | 3 |
| <i>Cereopsis novaehollandiae</i>       | Cape Barren Goose              | ANSERIFORMES     | Anatidae         | 1 | 2 |
| <i>Certhionyx variegatus</i>           | Pied Honeyeater                | PASSERIFORMES    | Meliphagidae     | 3 | 3 |
| <i>Ceyx azureus</i>                    | Azure Kingfisher               | CORACIIFORMES    | Alcedinidae      | 3 | 3 |
| <i>Ceyx pusilla</i>                    | Little Kingfisher              | CORACIIFORMES    | Alcedinidae      | 3 | 3 |
| <i>Charadrius australis</i>            | Inland Dotterel                | CHARADRIIFORMES  | Charadriidae     | 3 | 2 |
| <i>Chalcites basalis</i>               | Horsfield's Bronze-Cuckoo      | CUCULIFORMES     | Cuculidae        | 3 | 3 |
| <i>Chalcophaps indica</i>              | Emerald Dove                   | COLUMBIFORMES    | Columbidae       | 3 | 3 |
| <i>Chalcites lucidus</i>               | Shining Bronze-Cuckoo          | CUCULIFORMES     | Cuculidae        | 3 | 3 |
| <i>Chalcites minutillus</i>            | Little Bronze-Cuckoo           | CUCULIFORMES     | Cuculidae        | 1 | 3 |
| <i>Chalcites osculans</i>              | Black-eared Cuckoo             | CUCULIFORMES     | Cuculidae        | 3 | 3 |
| <i>Charadrius ruficapillus</i>         | Red-capped Plover              | CHARADRIIFORMES  | Charadriidae     | 3 | 3 |
| <i>Chenonetta jubata</i>               | Australian Wood Duck           | ANSERIFORMES     | Anatidae         | 3 | 3 |
| <i>Cheramoeca leucosterna</i>          | White-backed Swallow           | PASSERIFORMES    | Hirundinidae     | 3 | 2 |
| <i>Chlidonias hybrida</i>              | Whiskered Tern                 | CHARADRIIFORMES  | Laridae          | 3 | 3 |
| <i>Chroicocephalus novaehollandiae</i> | Silver Gull                    | CHARADRIIFORMES  | Laridae          | 3 | 3 |
| <i>Chthonicola sagittata</i>           | Speckled Warbler               | PASSERIFORMES    | Acanthizidae     | 6 | 6 |
| <i>Cinlosoma castaneothorax</i>        | Chestnut-breasted Quail-thrush | PASSERIFORMES    | Psophodidae      | 1 | 1 |
| <i>Cinlosoma castanotum</i>            | Chestnut Quail-thrush          | PASSERIFORMES    | Psophodidae      | 1 | 2 |
| <i>Cinlosoma cinnamomeum</i>           | Cinnamon Quail-thrush          | PASSERIFORMES    | Psophodidae      | 1 | 2 |
| <i>Cincloramphus cruralis</i>          | Brown Songlark                 | PASSERIFORMES    | Megaluridae      | 1 | 3 |
| <i>Cincloramphus mathewsi</i>          | Rufous Songlark                | PASSERIFORMES    | Megaluridae      | 1 | 3 |
| <i>Cinlosoma punctatum</i>             | Spotted Quail-thrush           | PASSERIFORMES    | Psophodidae      | 3 | 3 |
| <i>Circus approximans</i>              | Swamp Harrier                  | ACCIPITRIFORMES  | Accipitridae     | 1 | 1 |
| <i>Circus assimilis</i>                | Spotted Harrier                | ACCIPITRIFORMES  | Accipitridae     | 2 | 3 |
| <i>Cisticola exilis</i>                | Golden-headed Cisticola        | PASSERIFORMES    | Cisticolidae     | 2 | 2 |
| <i>Cisticola juncidis</i>              | Zitting Cisticola              | PASSERIFORMES    | Cisticolidae     | 3 | 2 |
| <i>Cissomela pectoralis</i>            | Banded Honeyeater              | PASSERIFORMES    | Meliphagidae     | 2 | 3 |
| <i>Cladorhynchus leucocephalus</i>     | Banded Stilt                   | CHARADRIIFORMES  | Recurvirostridae | 3 | 3 |
| <i>Climacteris affinis</i>             | White-browed Treecreeper       | PASSERIFORMES    | Climacteridae    | 1 | 2 |
| <i>Climacteris erythroptis</i>         | Red-browed Treecreeper         | PASSERIFORMES    | Climacteridae    | 3 | 3 |
| <i>Climacteris melanura</i>            | Black-tailed Treecreeper       | PASSERIFORMES    | Climacteridae    | 3 | 2 |
| <i>Climacteris picumnus</i>            | Brown Treecreeper              | PASSERIFORMES    | Climacteridae    | 3 | 3 |
| <i>Climacteris rufa</i>                | Rufous Treecreeper             | PASSERIFORMES    | Climacteridae    | 2 | 3 |

|                                  |                             |                |                 |   |   |
|----------------------------------|-----------------------------|----------------|-----------------|---|---|
| <i>Colluricincla boweri</i>      | Bower's Shrike-thrush       | PASSERIFORMES  | Pachycephalidae | 2 | 3 |
| <i>Colluricincla harmonica</i>   | Grey Shrike-thrush          | PASSERIFORMES  | Pachycephalidae | 2 | 3 |
| <i>Columba leucomela</i>         | White-headed Pigeon         | COLUMBIFORMES  | Columbidae      | 2 | 3 |
| <i>Colluricincla megarhyncha</i> | Little Shrike-thrush        | PASSERIFORMES  | Pachycephalidae | 3 | 3 |
| <i>Colluricincla woodwardi</i>   | Sandstone Shrike-thrush     | PASSERIFORMES  | Pachycephalidae | 2 | 3 |
| <i>Conopophila albogularis</i>   | Rufous-banded Honeyeater    | PASSERIFORMES  | Meliphagidae    | 3 | 3 |
| <i>Conopophila rufogularis</i>   | Rufous-throated Honeyeater  | PASSERIFORMES  | Meliphagidae    | 3 | 3 |
| <i>Conopophila whitei</i>        | Grey Honeyeater             | PASSERIFORMES  | Meliphagidae    | 3 | 4 |
| <i>Cormobates leucophaea</i>     | White-throated Treecreeper  | PASSERIFORMES  | Climacteridae   | 3 | 3 |
| <i>Coracina lineata</i>          | Barred Cuckoo-shrike        | PASSERIFORMES  | Campephagidae   | 2 | 3 |
| <i>Coracina maxima</i>           | Ground Cuckoo-shrike        | PASSERIFORMES  | Campephagidae   | 1 | 1 |
| <i>Coracina novaehollandiae</i>  | Black-faced Cuckoo-shrike   | PASSERIFORMES  | Campephagidae   | 3 | 3 |
| <i>Coracina papuensis</i>        | White-bellied Cuckoo-shrike | PASSERIFORMES  | Campephagidae   | 1 | 1 |
| <i>Coracina tenuirostris</i>     | Cicadabird                  | PASSERIFORMES  | Campephagidae   | 2 | 3 |
| <i>Corcorax melanorhamphos</i>   | White-winged Cough          | PASSERIFORMES  | Corcoracidae    | 3 | 3 |
| <i>Corvus bennetti</i>           | Little Crow                 | PASSERIFORMES  | Corvidae        | 2 | 3 |
| <i>Corvus coronoides</i>         | Australian Raven            | PASSERIFORMES  | Corvidae        | 3 | 3 |
| <i>Corvus mellori</i>            | Little Raven                | PASSERIFORMES  | Corvidae        | 3 | 3 |
| <i>Corvus orru</i>               | Torresian Crow              | PASSERIFORMES  | Corvidae        | 3 | 3 |
| <i>Corvus tasmanicus</i>         | Forest Raven                | PASSERIFORMES  | Corvidae        | 2 | 2 |
| <i>Coturnix pectoralis</i>       | Stubble Quail               | GALLIFORMES    | Phasianidae     | 3 | 3 |
| <i>Coturnix ypsilophora</i>      | Brown Quail                 | GALLIFORMES    | Phasianidae     | 3 | 3 |
| <i>Cracticus mentalis</i>        | Black-backed Butcherbird    | PASSERIFORMES  | Artamidae       | 2 | 2 |
| <i>Cracticus nigrogularis</i>    | Pied Butcherbird            | PASSERIFORMES  | Artamidae       | 1 | 3 |
| <i>Cracticus quoyi</i>           | Black Butcherbird           | PASSERIFORMES  | Artamidae       | 3 | 3 |
| <i>Cracticus tibicen</i>         | Australian Magpie           | PASSERIFORMES  | Artamidae       | 3 | 3 |
| <i>Cracticus torquatus</i>       | Grey Butcherbird            | PASSERIFORMES  | Artamidae       | 2 | 3 |
| <i>Cyclopsitta diophthalma</i>   | Double-eyed Fig-Parrot      | PSITTACIFORMES | Psittacidae     | 0 | 1 |
| <i>Cygnus atratus</i>            | Black Swan                  | ANSERIFORMES   | Anatidae        | 1 | 0 |
| <i>Dacelo leachii</i>            | Blue-winged Kookaburra      | CORACIIFORMES  | Halcyonidae     | 3 | 3 |
| <i>Dacelo novaeguineae</i>       | Laughing Kookaburra         | CORACIIFORMES  | Halcyonidae     | 3 | 3 |
| <i>Daphoenositta chrysoptera</i> | Varied Sittella             | PASSERIFORMES  | Neosittidae     | 3 | 3 |
| <i>Dasyornis brachypterus</i>    | Eastern Bristlebird         | PASSERIFORMES  | Dasyornithidae  | 2 | 3 |
| <i>Dasyornis broadbenti</i>      | Rufous Bristlebird          | PASSERIFORMES  | Dasyornithidae  | 1 | 3 |
| <i>Dasyornis longirostris</i>    | Western Bristlebird         | PASSERIFORMES  | Dasyornithidae  | 1 | 1 |
| <i>Dendrocygna arcuata</i>       | Wandering Whistling-Duck    | ANSERIFORMES   | Anatidae        | 1 | 2 |
| <i>Dendrocygna eytoni</i>        | Plumed Whistling-Duck       | ANSERIFORMES   | Anatidae        | 3 | 2 |
| <i>Dicrurus bracteatus</i>       | Spangled Drongo             | PASSERIFORMES  | Dicruridae      | 3 | 2 |
| <i>Dicaeum hirundinaceum</i>     | Mistletoebird               | PASSERIFORMES  | Nectariniidae   | 3 | 3 |
| <i>Dromaius novaehollandiae</i>  | Emu                         | CASUARIIFORMES | Casuariidae     | 2 | 0 |
| <i>Drymodes brunneopygia</i>     | Southern Scrub-robin        | PASSERIFORMES  | Petroicidae     | 2 | 3 |
| <i>Drymodes superciliosus</i>    | Northern Scrub-robin        | PASSERIFORMES  | Petroicidae     | 0 | 4 |
| <i>Ducula bicolor</i>            | Pied Imperial-Pigeon        | COLUMBIFORMES  | Columbidae      | 3 | 3 |
| <i>Eclectus roratus</i>          | Eclectus Parrot             | PSITTACIFORMES | Psittacidae     | 3 | 3 |
| <i>Ardea alba</i>                | Great Egret                 | CICONIIFORMES  | Ardeidae        | 1 | 3 |
| <i>Egretta garzetta</i>          | Little Egret                | CICONIIFORMES  | Ardeidae        | 1 | 2 |

|                                    |                         |                  |                 |   |   |
|------------------------------------|-------------------------|------------------|-----------------|---|---|
| <i>Egretta novaehollandiae</i>     | White-faced Heron       | CICONIIFORMES    | Ardeidae        | 3 | 3 |
| <i>Egretta picata</i>              | Pied Heron              | CICONIIFORMES    | Ardeidae        | 3 | 3 |
| <i>Egretta sacra</i>               | Eastern Reef Egret      | CICONIIFORMES    | Ardeidae        | 3 | 2 |
| <i>Elanus axillaris</i>            | Black-shouldered Kite   | ACCIPITRIFORMES  | Accipitridae    | 3 | 3 |
| <i>Elanus scriptus</i>             | Letter-winged Kite      | ACCIPITRIFORMES  | Accipitridae    | 3 | 2 |
| <i>Elsyornis melanops</i>          | Black-fronted Dotterel  | CHARADRIIFORMES  | Charadriidae    | 3 | 3 |
| <i>Emblema pictum</i>              | Painted Finch           | PASSERIFORMES    | Estrildidae     | 3 | 3 |
| <i>Entomyzon cyanotis</i>          | Blue-faced Honeyeater   | PASSERIFORMES    | Meliphagidae    | 3 | 3 |
| <i>Eolophus roseicapillus</i>      | Galah                   | PSITTACIFORMES   | Cacatuidae      | 3 | 3 |
| <i>Eopsaltria australis</i>        | Eastern Yellow Robin    | PASSERIFORMES    | Petroicidae     | 3 | 3 |
| <i>Eopsaltria georgiana</i>        | White-breasted Robin    | PASSERIFORMES    | Petroicidae     | 2 | 2 |
| <i>Eopsaltria griseogularis</i>    | Western Yellow Robin    | PASSERIFORMES    | Petroicidae     | 2 | 3 |
| <i>Ephippiorhynchus asiaticus</i>  | Black-necked Stork      | CICONIIFORMES    | Ciconiidae      | 1 | 0 |
| <i>Epthianura albifrons</i>        | White-fronted Chat      | PASSERIFORMES    | Meliphagidae    | 3 | 3 |
| <i>Epthianura aurifrons</i>        | Orange Chat             | PASSERIFORMES    | Meliphagidae    | 3 | 3 |
| <i>Epthianura crocea</i>           | Yellow Chat             | PASSERIFORMES    | Meliphagidae    | 2 | 2 |
| <i>Epthianura tricolor</i>         | Crimson Chat            | PASSERIFORMES    | Meliphagidae    | 3 | 3 |
| <i>Eremiornis carteri</i>          | Spinifexbird            | PASSERIFORMES    | Megaluridae     | 2 | 3 |
| <i>Erythrogonys cinctus</i>        | Red-kneed Dotterel      | CHARADRIIFORMES  | Charadriidae    | 3 | 3 |
| <i>Erythrura gouldiae</i>          | Gouldian Finch          | PASSERIFORMES    | Estrildidae     | 3 | 3 |
| <i>Erythrotriorchis radiatus</i>   | Red Goshawk             | ACCIPITRIFORMES  | Accipitridae    | 3 | 3 |
| <i>Erythrura trichroa</i>          | Blue-faced Parrot-Finch | PASSERIFORMES    | Estrildidae     | 1 | 1 |
| <i>Esacus magnirostris</i>         | Beach Stone-curlew      | CHARADRIIFORMES  | Burhinidae      | 1 | 1 |
| <i>Eudynamys scolopaceus</i>       | Asian Koel              | CUCULIFORMES     | Cuculidae       | 3 | 3 |
| <i>Eulabeornis castaneoventris</i> | Chestnut Rail           | GRUIFORMES       | Rallidae        | 3 | 1 |
| <i>Eurostopodus argus</i>          | Spotted Nightjar        | CAPRIMULGIFORMES | Eurostopodidae  | 3 | 3 |
| <i>Eurostopodus mystacalis</i>     | White-throated Nightjar | CAPRIMULGIFORMES | Eurostopodidae  | 2 | 2 |
| <i>Eurystomus orientalis</i>       | Dollarbird              | CORACIIFORMES    | Coraciidae      | 3 | 3 |
| <i>Excalfactoria chinensis</i>     | King Quail              | GALLIFORMES      | Phasianidae     | 3 | 3 |
| <i>Falco berigora</i>              | Brown Falcon            | FALCONIFORMES    | Falconidae      | 3 | 3 |
| <i>Falco cenchroides</i>           | Nankeen Kestrel         | FALCONIFORMES    | Falconidae      | 3 | 3 |
| <i>Falcunculus frontatus</i>       | Crested Shrike-tit      | PASSERIFORMES    | Pachycephalidae | 3 | 3 |
| <i>Falco hypoleucos</i>            | Grey Falcon             | FALCONIFORMES    | Falconidae      | 1 | 3 |
| <i>Falco longipennis</i>           | Australian Hobby        | FALCONIFORMES    | Falconidae      | 3 | 3 |
| <i>Falco peregrinus</i>            | Peregrine Falcon        | FALCONIFORMES    | Falconidae      | 3 | 3 |
| <i>Falco subniger</i>              | Black Falcon            | FALCONIFORMES    | Falconidae      | 2 | 3 |
| <i>Fulica atra</i>                 | Eurasian Coot           | GRUIFORMES       | Rallidae        | 3 | 3 |
| <i>Gallirallus philippensis</i>    | Buff-banded Rail        | GRUIFORMES       | Rallidae        | 3 | 3 |
| <i>Gallinula tenebrosa</i>         | Dusky Moorhen           | GRUIFORMES       | Rallidae        | 3 | 3 |
| <i>Gelochelidon nilotica</i>       | Gull-billed Tern        | CHARADRIIFORMES  | Laridae         | 1 | 3 |
| <i>Geopelia cuneata</i>            | Diamond Dove            | COLUMBIFORMES    | Columbidae      | 3 | 3 |
| <i>Geoffroyus geoffroyi</i>        | Red-cheeked Parrot      | PSITTACIFORMES   | Psittacidae     | 2 | 2 |
| <i>Geopelia humeralis</i>          | Bar-shouldered Dove     | COLUMBIFORMES    | Columbidae      | 3 | 3 |
| <i>Geophaps plumifera</i>          | Spinifex Pigeon         | COLUMBIFORMES    | Columbidae      | 3 | 3 |
| <i>Geophaps scripta</i>            | Squatter Pigeon         | COLUMBIFORMES    | Columbidae      | 2 | 2 |
| <i>Geophaps smithii</i>            | Partridge Pigeon        | COLUMBIFORMES    | Columbidae      | 2 | 3 |

|                                     |                               |                 |                  |   |   |
|-------------------------------------|-------------------------------|-----------------|------------------|---|---|
| <i>Geopelia striata</i>             | Peaceful Dove                 | COLUMBIFORMES   | Columbidae       | 3 | 3 |
| <i>Gerygone albugularis</i>         | White-throated Gerygone       | PASSERIFORMES   | Acanthizidae     | 3 | 2 |
| <i>Gerygone chloronota</i>          | Green-backed Gerygone         | PASSERIFORMES   | Acanthizidae     | 1 | 3 |
| <i>Gerygone fusca</i>               | Western Gerygone              | PASSERIFORMES   | Acanthizidae     | 2 | 2 |
| <i>Gerygone levigaster</i>          | Mangrove Gerygone             | PASSERIFORMES   | Acanthizidae     | 3 | 1 |
| <i>Gerygone magnirostris</i>        | Large-billed Gerygone         | PASSERIFORMES   | Acanthizidae     | 2 | 2 |
| <i>Gerygone mouki</i>               | Brown Gerygone                | PASSERIFORMES   | Acanthizidae     | 2 | 2 |
| <i>Gerygone palpebrosa</i>          | Fairy Gerygone                | PASSERIFORMES   | Acanthizidae     | 1 | 3 |
| <i>Gerygone tenebrosa</i>           | Dusky Gerygone                | PASSERIFORMES   | Acanthizidae     | 3 | 3 |
| <i>Glossopsitta concinna</i>        | Musk Lorikeet                 | PSITTACIFORMES  | Psittacidae      | 3 | 3 |
| <i>Glossopsitta porphyrocephala</i> | Purple-crowned Lorikeet       | PSITTACIFORMES  | Psittacidae      | 3 | 3 |
| <i>Glossopsitta pusilla</i>         | Little Lorikeet               | PSITTACIFORMES  | Psittacidae      | 2 | 3 |
| <i>Glycichaera fallax</i>           | Green-backed Honeyeater       | PASSERIFORMES   | Meliphagidae     | 2 | 2 |
| <i>Glyciphila melanops</i>          | Tawny-crowned Honeyeater      | PASSERIFORMES   | Meliphagidae     | 3 | 3 |
| <i>Grallina cyanoleuca</i>          | Magpie-lark                   | PASSERIFORMES   | Monarchidae      | 3 | 3 |
| <i>Grantiella picta</i>             | Painted Honeyeater            | PASSERIFORMES   | Meliphagidae     | 3 | 3 |
| <i>Grus antigone</i>                | Sarus Crane                   | GRUIFORMES      | Gruidae          | 3 | 2 |
| <i>Grus rubicunda</i>               | Brolga                        | GRUIFORMES      | Gruidae          | 2 | 3 |
| <i>Haematopus fuliginosus</i>       | Sooty Oystercatcher           | CHARADRIIFORMES | Haematopodidae   | 1 | 3 |
| <i>Haematopus longirostris</i>      | Australian Pied Oystercatcher | CHARADRIIFORMES | Haematopodidae   | 3 | 2 |
| <i>Haliastur indus</i>              | Brahminy Kite                 | ACCIPITRIFORMES | Accipitridae     | 2 | 1 |
| <i>Haliaeetus leucogaster</i>       | White-bellied Sea-Eagle       | ACCIPITRIFORMES | Accipitridae     | 3 | 1 |
| <i>Haliastur spheurnus</i>          | Whistling Kite                | ACCIPITRIFORMES | Accipitridae     | 2 | 3 |
| <i>Hamirostra melanosternon</i>     | Black-breasted Buzzard        | ACCIPITRIFORMES | Accipitridae     | 2 | 2 |
| <i>Heteromyias cinereifrons</i>     | Grey-headed Robin             | PASSERIFORMES   | Petroicidae      | 3 | 3 |
| <i>Heteromunia pectoralis</i>       | Pictorella Mannikin           | PASSERIFORMES   | Estrildidae      | 3 | 3 |
| <i>Hieraaetus morphnoides</i>       | Little Eagle                  | ACCIPITRIFORMES | Accipitridae     | 3 | 2 |
| <i>Himantopus himantopus</i>        | Black-winged Stilt            | CHARADRIIFORMES | Recurvirostridae | 3 | 1 |
| <i>Hirundo neoxena</i>              | Welcome Swallow               | PASSERIFORMES   | Hirundinidae     | 3 | 3 |
| <i>Hydroprogne caspia</i>           | Caspian Tern                  | CHARADRIIFORMES | Laridae          | 1 | 2 |
| <i>Hylacola cauta</i>               | Shy Heathwren                 | PASSERIFORMES   | Acanthizidae     | 2 | 3 |
| <i>Hylacola pyrrhopygia</i>         | Chestnut-rumped Heathwren     | PASSERIFORMES   | Acanthizidae     | 3 | 3 |
| <i>Irediparra gallinacea</i>        | Comb-crested Jacana           | CHARADRIIFORMES | Jacanidae        | 3 | 1 |
| <i>Ixobrychus dubius</i>            | Australian Little Bittern     | CICONIIFORMES   | Ardeidae         | 2 | 3 |
| <i>Ixobrychus flavicollis</i>       | Black Bittern                 | CICONIIFORMES   | Ardeidae         | 1 | 2 |
| <i>Lalage leucomela</i>             | Varied Triller                | PASSERIFORMES   | Campephagidae    | 3 | 3 |
| <i>Lalage sueurii</i>               | White-winged Triller          | PASSERIFORMES   | Campephagidae    | 2 | 3 |
| <i>Larus dominicanus</i>            | Kelp Gull                     | CHARADRIIFORMES | Laridae          | 3 | 3 |
| <i>Larus pacificus</i>              | Pacific Gull                  | CHARADRIIFORMES | Laridae          | 1 | 3 |
| <i>Lathamus discolor</i>            | Swift Parrot                  | PSITTACIFORMES  | Psittacidae      | 3 | 3 |
| <i>Leipoa ocellata</i>              | Malleefowl                    | GALLIFORMES     | Megapodiidae     | 1 | 1 |
| <i>Leucosarcia picata</i>           | Wonga Pigeon                  | COLUMBIFORMES   | Columbidae       | 2 | 2 |
| <i>Lewinia pectoralis</i>           | Lewin's Rail                  | GRUIFORMES      | Rallidae         | 3 | 3 |
| <i>Lichenostomus chrysops</i>       | Yellow-faced Honeyeater       | PASSERIFORMES   | Meliphagidae     | 3 | 3 |
| <i>Lichenostomus cratitius</i>      | Purple-gaped Honeyeater       | PASSERIFORMES   | Meliphagidae     | 3 | 3 |



|                                     |                            |                 |              |   |   |
|-------------------------------------|----------------------------|-----------------|--------------|---|---|
| <i>Lichenostomus fasciogularis</i>  | Mangrove Honeyeater        | PASSERIFORMES   | Meliphagidae | 1 | 1 |
| <i>Lichenostomus flavescens</i>     | Yellow-tinted Honeyeater   | PASSERIFORMES   | Meliphagidae | 3 | 3 |
| <i>Lichenostomus flavicollis</i>    | Yellow-throated Honeyeater | PASSERIFORMES   | Meliphagidae | 3 | 3 |
| <i>Lichenostomus flavus</i>         | Yellow Honeyeater          | PASSERIFORMES   | Meliphagidae | 3 | 2 |
| <i>Lichenostomus frenatus</i>       | Bridled Honeyeater         | PASSERIFORMES   | Meliphagidae | 3 | 3 |
| <i>Lichenostomus fuscus</i>         | Fuscous Honeyeater         | PASSERIFORMES   | Meliphagidae | 3 | 3 |
| <i>Lichenostomus hindwoodi</i>      | Eungella Honeyeater        | PASSERIFORMES   | Meliphagidae | 2 | 1 |
| <i>Lichmera indistincta</i>         | Brown Honeyeater           | PASSERIFORMES   | Meliphagidae | 3 | 3 |
| <i>Lichenostomus keartlandi</i>     | Grey-headed Honeyeater     | PASSERIFORMES   | Meliphagidae | 2 | 1 |
| <i>Lichenostomus leucotis</i>       | White-eared Honeyeater     | PASSERIFORMES   | Meliphagidae | 3 | 3 |
| <i>Lichenostomus melanops</i>       | Yellow-tufted Honeyeater   | PASSERIFORMES   | Meliphagidae | 3 | 3 |
| <i>Lichenostomus ornatus</i>        | Yellow-plumed Honeyeater   | PASSERIFORMES   | Meliphagidae | 3 | 3 |
| <i>Lichenostomus penicillatus</i>   | White-plumed Honeyeater    | PASSERIFORMES   | Meliphagidae | 3 | 3 |
| <i>Lichenostomus plumulus</i>       | Grey-fronted Honeyeater    | PASSERIFORMES   | Meliphagidae | 2 | 3 |
| <i>Lichenostomus unicolor</i>       | White-gaped Honeyeater     | PASSERIFORMES   | Meliphagidae | 3 | 3 |
| <i>Lichenostomus versicolor</i>     | Varied Honeyeater          | PASSERIFORMES   | Meliphagidae | 3 | 4 |
| <i>Lichenostomus virescens</i>      | Singing Honeyeater         | PASSERIFORMES   | Meliphagidae | 3 | 3 |
| <i>Lonchura castaneothorax</i>      | Chestnut-breasted Mannikin | PASSERIFORMES   | Estrildidae  | 3 | 3 |
| <i>Lonchura flaviprymna</i>         | Yellow-rumped Mannikin     | PASSERIFORMES   | Estrildidae  | 1 | 2 |
| <i>Lopholaimus antarcticus</i>      | Topknot Pigeon             | COLUMBIFORMES   | Columbidae   | 3 | 3 |
| <i>Lophoictinia isura</i>           | Square-tailed Kite         | ACCIPITRIFORMES | Accipitridae | 1 | 3 |
| <i>Lophochroa leadbeateri</i>       | Major Mitchell's Cockatoo  | PSITTACIFORMES  | Cacatuidae   | 3 | 3 |
| <i>Macropygia amboinensis</i>       | Brown Cuckoo-Dove          | COLUMBIFORMES   | Columbidae   | 1 | 3 |
| <i>Machaerirhynchus flaviventer</i> | Yellow-breasted Boatbill   | PASSERIFORMES   | Monarchidae  | 1 | 3 |
| <i>Malurus amabilis</i>             | Lovely Fairy-wren          | PASSERIFORMES   | Maluridae    | 2 | 3 |
| <i>Malurus coronatus</i>            | Purple-crowned Fairy-wren  | PASSERIFORMES   | Maluridae    | 3 | 2 |
| <i>Malurus cyaneus</i>              | Superb Fairy-wren          | PASSERIFORMES   | Maluridae    | 3 | 3 |
| <i>Malurus elegans</i>              | Red-winged Fairy-wren      | PASSERIFORMES   | Maluridae    | 2 | 3 |
| <i>Malurus lamberti</i>             | Variiegated Fairy-wren     | PASSERIFORMES   | Maluridae    | 2 | 3 |
| <i>Malurus leucopterus</i>          | White-winged Fairy-wren    | PASSERIFORMES   | Maluridae    | 3 | 3 |
| <i>Malurus melanocephalus</i>       | Red-backed Fairy-wren      | PASSERIFORMES   | Maluridae    | 3 | 3 |
| <i>Malacorhynchus membranaceus</i>  | Pink-eared Duck            | ANSERIFORMES    | Anatidae     | 2 | 3 |
| <i>Malurus pulcherrimus</i>         | Blue-breasted Fairy-wren   | PASSERIFORMES   | Maluridae    | 2 | 3 |
| <i>Malurus splendens</i>            | Splendid Fairy-wren        | PASSERIFORMES   | Maluridae    | 2 | 3 |
| <i>Manorina flavigula</i>           | Yellow-throated Miner      | PASSERIFORMES   | Meliphagidae | 3 | 3 |
| <i>Manorina melanocephala</i>       | Noisy Miner                | PASSERIFORMES   | Meliphagidae | 3 | 3 |
| <i>Manorina melanophrys</i>         | Bell Miner                 | PASSERIFORMES   | Meliphagidae | 3 | 3 |
| <i>Manorina melanotis</i>           | Black-eared Miner          | PASSERIFORMES   | Meliphagidae | 1 | 2 |
| <i>Megalurus gramineus</i>          | Little Grassbird           | PASSERIFORMES   | Megaluridae  | 2 | 3 |
| <i>Megapodius reinwardt</i>         | Orange-footed Scrubfowl    | GALLIFORMES     | Megapodiidae | 2 | 3 |
| <i>Megalurus timoriensis</i>        | Tawny Grassbird            | PASSERIFORMES   | Megaluridae  | 1 | 1 |
| <i>Melithreptus affinis</i>         | Black-headed Honeyeater    | PASSERIFORMES   | Meliphagidae | 3 | 1 |
| <i>Meliphaga albilineata</i>        | White-lined Honeyeater     | PASSERIFORMES   | Meliphagidae | 1 | 1 |
| <i>Melithreptus albugularis</i>     | White-throated Honeyeater  | PASSERIFORMES   | Meliphagidae | 1 | 3 |
| <i>Melithreptus brevirostris</i>    | Brown-headed Honeyeater    | PASSERIFORMES   | Meliphagidae | 2 | 3 |
| <i>Melanodryas cucullata</i>        | Hooded Robin               | PASSERIFORMES   | Petroicidae  | 3 | 3 |

|                                   |                           |                      |                   |   |   |
|-----------------------------------|---------------------------|----------------------|-------------------|---|---|
| <i>Meliphaga gracilis</i>         | Graceful Honeyeater       | PASSERIFORMES        | Meliphagidae      | 1 | 3 |
| <i>Melithreptus gularis</i>       | Black-chinned Honeyeater  | PASSERIFORMES        | Meliphagidae      | 3 | 3 |
| <i>Meliphaga lewinii</i>          | Lewin's Honeyeater        | PASSERIFORMES        | Meliphagidae      | 3 | 3 |
| <i>Melithreptus lunatus</i>       | White-naped Honeyeater    | PASSERIFORMES        | Meliphagidae      | 3 | 3 |
| <i>Meliphaga notata</i>           | Yellow-spotted Honeyeater | PASSERIFORMES        | Meliphagidae      | 2 | 3 |
| <i>Melopsittacus undulatus</i>    | Budgerigar                | PSITTACIFORMES       | Psittacidae       | 3 | 3 |
| <i>Melithreptus validirostris</i> | Strong-billed Honeyeater  | PASSERIFORMES        | Meliphagidae      | 1 | 3 |
| <i>Melanodryas vittata</i>        | Dusky Robin               | PASSERIFORMES        | Petroicidae       | 2 | 2 |
| <i>Menura alberti</i>             | Albert's Lyrebird         | PASSERIFORMES        | Menuridae         | 2 | 2 |
| <i>Menura novaehollandiae</i>     | Superb Lyrebird           | PASSERIFORMES        | Menuridae         | 3 | 3 |
| <i>Merops ornatus</i>             | Rainbow Bee-eater         | CORACIIFORMES        | Meropidae         | 3 | 3 |
| <i>Microeca fascians</i>          | Jacky Winter              | PASSERIFORMES        | Petroicidae       | 1 | 2 |
| <i>Microeca flavigaster</i>       | Lemon-bellied Flycatcher  | PASSERIFORMES        | Petroicidae       | 3 | 3 |
| <i>Microeca griseiceps</i>        | Yellow-legged Flycatcher  | PASSERIFORMES        | Petroicidae       | 1 | 2 |
| <i>Microcarbo melanoleucos</i>    | Little Pied Cormorant     | PHALACROCORACIFORMES | Phalacrocoracidae | 3 | 3 |
| <i>Milvus migrans</i>             | Black Kite                | ACCIPITRIFORMES      | Accipitridae      | 3 | 3 |
| <i>Mirafra javanica</i>           | Horsfield's Bushlark      | PASSERIFORMES        | Alaudidae         | 2 | 3 |
| <i>Monarcha frater</i>            | Black-winged Monarch      | PASSERIFORMES        | Monarchidae       | 3 | 2 |
| <i>Monarcha melanopsis</i>        | Black-faced Monarch       | PASSERIFORMES        | Monarchidae       | 2 | 3 |
| <i>Myiagra alecto</i>             | Shining Flycatcher        | PASSERIFORMES        | Monarchidae       | 3 | 3 |
| <i>Myiagra cyanoleuca</i>         | Satin Flycatcher          | PASSERIFORMES        | Monarchidae       | 3 | 3 |
| <i>Myiagra inquieta</i>           | Restless Flycatcher       | PASSERIFORMES        | Monarchidae       | 1 | 3 |
| <i>Myiagra rubecula</i>           | Leaden Flycatcher         | PASSERIFORMES        | Monarchidae       | 2 | 3 |
| <i>Myiagra ruficollis</i>         | Broad-billed Flycatcher   | PASSERIFORMES        | Monarchidae       | 1 | 2 |
| <i>Myzomela erythrocephala</i>    | Red-headed Honeyeater     | PASSERIFORMES        | Meliphagidae      | 3 | 3 |
| <i>Myzomela obscura</i>           | Dusky Honeyeater          | PASSERIFORMES        | Meliphagidae      | 3 | 3 |
| <i>Myzomela sanguinolenta</i>     | Scarlet Honeyeater        | PASSERIFORMES        | Meliphagidae      | 1 | 3 |
| <i>Nectarinia jugularis</i>       | Olive-backed Sunbird      | PASSERIFORMES        | Nectariniidae     | 3 | 3 |
| <i>Neopsephotus bourkii</i>       | Bourke's Parrot           | PSITTACIFORMES       | Psittacidae       | 2 | 2 |
| <i>Neophema chrysogaster</i>      | Orange-bellied Parrot     | PSITTACIFORMES       | Psittacidae       | 0 | 2 |
| <i>Neophema chrysostoma</i>       | Blue-winged Parrot        | PSITTACIFORMES       | Psittacidae       | 3 | 3 |
| <i>Neophema elegans</i>           | Elegant Parrot            | PSITTACIFORMES       | Psittacidae       | 1 | 3 |
| <i>Neochmia modesta</i>           | Plum-headed Finch         | PASSERIFORMES        | Estrildidae       | 2 | 2 |
| <i>Neophema petrophila</i>        | Rock Parrot               | PSITTACIFORMES       | Psittacidae       | 2 | 2 |
| <i>Neochmia phaeton</i>           | Crimson Finch             | PASSERIFORMES        | Estrildidae       | 2 | 3 |
| <i>Neophema pulchella</i>         | Turquoise Parrot          | PSITTACIFORMES       | Psittacidae       | 3 | 1 |
| <i>Neochmia ruficauda</i>         | Star Finch                | PASSERIFORMES        | Estrildidae       | 2 | 1 |
| <i>Neophema splendida</i>         | Scarlet-chested Parrot    | PSITTACIFORMES       | Psittacidae       | 3 | 3 |
| <i>Neochmia temporalis</i>        | Red-browed Finch          | PASSERIFORMES        | Estrildidae       | 2 | 3 |
| <i>Nettapus coromandelianus</i>   | Cotton Pygmy-goose        | ANSERIFORMES         | Anatidae          | 2 | 3 |
| <i>Nettapus pulchellus</i>        | Green Pygmy-goose         | ANSERIFORMES         | Anatidae          | 3 | 3 |
| <i>Ninox connivens</i>            | Barking Owl               | STRIGIFORMES         | Strigidae         | 3 | 1 |
| <i>Ninox novaeseelandiae</i>      | Southern Boobook          | STRIGIFORMES         | Strigidae         | 3 | 3 |
| <i>Ninox rufa</i>                 | Rufous Owl                | STRIGIFORMES         | Strigidae         | 3 | 3 |
| <i>Ninox strenua</i>              | Powerful Owl              | STRIGIFORMES         | Strigidae         | 3 | 3 |
| <i>Northiella haematogaster</i>   | Blue Bonnet               | PSITTACIFORMES       | Psittacidae       | 3 | 3 |

|                                   |                              |                      |                   |   |   |
|-----------------------------------|------------------------------|----------------------|-------------------|---|---|
| <i>Nycticorax caledonicus</i>     | Nankeen Night-Heron          | CICONIIFORMES        | Ardeidae          | 1 | 3 |
| <i>Nymphicus hollandicus</i>      | Cockatiel                    | PSITTACIFORMES       | Cacatuidae        | 3 | 3 |
| <i>Ocyphaps lophotes</i>          | Crested Pigeon               | COLUMBIFORMES        | Columbidae        | 3 | 3 |
| <i>Oreoica gutturalis</i>         | Crested Bellbird             | PASSERIFORMES        | Pachycephalidae   | 3 | 3 |
| <i>Oreoscopus gutturalis</i>      | Fernwren                     | PASSERIFORMES        | Acanthizidae      | 1 | 2 |
| <i>Oriolus flavocinctus</i>       | Yellow Oriole                | PASSERIFORMES        | Oriolidae         | 3 | 3 |
| <i>Oriolus sagittatus</i>         | Olive-backed Oriole          | PASSERIFORMES        | Oriolidae         | 3 | 3 |
| <i>Origma solitaria</i>           | Rockwarbler                  | PASSERIFORMES        | Acanthizidae      | 3 | 1 |
| <i>Orthonyx spaldingii</i>        | Chowchilla                   | PASSERIFORMES        | Orthonychidae     | 2 | 2 |
| <i>Orthonyx temminckii</i>        | Australian Logrunner         | PASSERIFORMES        | Orthonychidae     | 3 | 3 |
| <i>Oxyura australis</i>           | Blue-billed Duck             | ANSERIFORMES         | Anatidae          | 3 | 3 |
| <i>Pachycephala inornata</i>      | Gilbert's Whistler           | PASSERIFORMES        | Pachycephalidae   | 3 | 3 |
| <i>Pachycephala lanioides</i>     | White-breasted Whistler      | PASSERIFORMES        | Pachycephalidae   | 3 | 3 |
| <i>Pachycephala melanura</i>      | Mangrove Golden Whistler     | PASSERIFORMES        | Pachycephalidae   | 2 | 3 |
| <i>Pachycephala olivacea</i>      | Olive Whistler               | PASSERIFORMES        | Pachycephalidae   | 3 | 3 |
| <i>Pachycephala pectoralis</i>    | Golden Whistler              | PASSERIFORMES        | Pachycephalidae   | 2 | 3 |
| <i>Pachycephala rufiventris</i>   | Rufous Whistler              | PASSERIFORMES        | Pachycephalidae   | 3 | 3 |
| <i>Pachycephala rufogularis</i>   | Red-lore Whistler            | PASSERIFORMES        | Pachycephalidae   | 1 | 3 |
| <i>Pachycephala simplex</i>       | Grey Whistler                | PASSERIFORMES        | Pachycephalidae   | 2 | 1 |
| <i>Pandion cristatus</i>          | Eastern Osprey               | ACCIPITRIFORMES      | Accipitridae      | 1 | 2 |
| <i>Pardalotus punctatus</i>       | Spotted Pardalote            | PASSERIFORMES        | Pardalotidae      | 3 | 3 |
| <i>Pardalotus quadragintus</i>    | Forty-spotted Pardalote      | PASSERIFORMES        | Pardalotidae      | 2 | 2 |
| <i>Pardalotus rubricatus</i>      | Red-browed Pardalote         | PASSERIFORMES        | Pardalotidae      | 3 | 3 |
| <i>Pardalotus striatus</i>        | Striated Pardalote           | PASSERIFORMES        | Pardalotidae      | 3 | 3 |
| <i>Pedionomus torquatus</i>       | Plains-wanderer              | CHARADRIIFORMES      | Pedionomidae      | 3 | 3 |
| <i>Pelecanus conspicillatus</i>   | Australian Pelican           | CICONIIFORMES        | Pelecanidae       | 0 | 3 |
| <i>Peneonanthe pulverulenta</i>   | Mangrove Robin               | PASSERIFORMES        | Petroicidae       | 3 | 2 |
| <i>Petrophassa albipennis</i>     | White-quilled Rock-Pigeon    | COLUMBIFORMES        | Columbidae        | 1 | 2 |
| <i>Petrochelidon ariel</i>        | Fairy Martin                 | PASSERIFORMES        | Hirundinidae      | 2 | 3 |
| <i>Petroica boodang</i>           | Scarlet Robin                | PASSERIFORMES        | Petroicidae       | 3 | 3 |
| <i>Petroica goodenovii</i>        | Red-capped Robin             | PASSERIFORMES        | Petroicidae       | 3 | 3 |
| <i>Petrochelidon nigricans</i>    | Tree Martin                  | PASSERIFORMES        | Hirundinidae      | 2 | 3 |
| <i>Petroica phoenicea</i>         | Flame Robin                  | PASSERIFORMES        | Petroicidae       | 3 | 3 |
| <i>Petroica rodinogaster</i>      | Pink Robin                   | PASSERIFORMES        | Petroicidae       | 1 | 3 |
| <i>Petroica rosea</i>             | Rose Robin                   | PASSERIFORMES        | Petroicidae       | 3 | 3 |
| <i>Petrophassa rufipennis</i>     | Chestnut-quilled Rock-Pigeon | COLUMBIFORMES        | Columbidae        | 3 | 3 |
| <i>Pezoporus wallicus</i>         | Ground Parrot                | PSITTACIFORMES       | Psittacidae       | 2 | 2 |
| <i>Phalacrocorax carbo</i>        | Great Cormorant              | PHALACROCORACIFORMES | Phalacrocoracidae | 3 | 3 |
| <i>Phaps chalcoptera</i>          | Common Bronzewing            | COLUMBIFORMES        | Columbidae        | 3 | 3 |
| <i>Phaps elegans</i>              | Brush Bronzewing             | COLUMBIFORMES        | Columbidae        | 3 | 3 |
| <i>Phalacrocorax fuscescens</i>   | Black-faced Cormorant        | PHALACROCORACIFORMES | Phalacrocoracidae | 3 | 2 |
| <i>Phaps histrionica</i>          | Flock Bronzewing             | COLUMBIFORMES        | Columbidae        | 1 | 3 |
| <i>Phalacrocorax sulcirostris</i> | Little Black Cormorant       | PHALACROCORACIFORMES | Phalacrocoracidae | 2 | 3 |
| <i>Phalacrocorax varius</i>       | Pied Cormorant               | PHALACROCORACIFORMES | Phalacrocoracidae | 3 | 3 |
| <i>Philemon argenteiceps</i>      | Silver-crowned Friarbird     | PASSERIFORMES        | Meliphagidae      | 2 | 1 |

|                                     |                          |                  |                   |   |   |
|-------------------------------------|--------------------------|------------------|-------------------|---|---|
| <i>Philemon buceroides</i>          | Helmeted Friarbird       | PASSERIFORMES    | Meliphagidae      | 3 | 3 |
| <i>Philemon citreogularis</i>       | Little Friarbird         | PASSERIFORMES    | Meliphagidae      | 1 | 3 |
| <i>Philemon corniculatus</i>        | Noisy Friarbird          | PASSERIFORMES    | Meliphagidae      | 1 | 3 |
| <i>Phonygammus keraudrenii</i>      | Trumpet Manucode         | PASSERIFORMES    | Paradisaeidae     | 1 | 3 |
| <i>Phylidonyris niger</i>           | White-cheeked Honeyeater | PASSERIFORMES    | Meliphagidae      | 3 | 2 |
| <i>Phylidonyris novaehollandiae</i> | New Holland Honeyeater   | PASSERIFORMES    | Meliphagidae      | 3 | 3 |
| <i>Phylidonyris pyrrhopterus</i>    | Crescent Honeyeater      | PASSERIFORMES    | Meliphagidae      | 3 | 3 |
| <i>Pitta erythrogaster</i>          | Red-bellied Pitta        | PASSERIFORMES    | Pittidae          | 0 | 3 |
| <i>Pitta iris</i>                   | Rainbow Pitta            | PASSERIFORMES    | Pittidae          | 3 | 3 |
| <i>Pitta versicolor</i>             | Noisy Pitta              | PASSERIFORMES    | Pittidae          | 2 | 1 |
| <i>Platycercus adscitus</i>         | Pale-headed Rosella      | PSITTACIFORMES   | Psittacidae       | 3 | 3 |
| <i>Platycercus caledonicus</i>      | Green Rosella            | PSITTACIFORMES   | Psittacidae       | 3 | 2 |
| <i>Platycercus elegans</i>          | Crimson Rosella          | PSITTACIFORMES   | Psittacidae       | 3 | 3 |
| <i>Platycercus eximius</i>          | Eastern Rosella          | PSITTACIFORMES   | Psittacidae       | 3 | 3 |
| <i>Platalea flavipes</i>            | Yellow-billed Spoonbill  | CICONIIFORMES    | Threskiornithidae | 1 | 1 |
| <i>Platycercus icterotis</i>        | Western Rosella          | PSITTACIFORMES   | Psittacidae       | 3 | 3 |
| <i>Platalea regia</i>               | Royal Spoonbill          | CICONIIFORMES    | Threskiornithidae | 2 | 0 |
| <i>Platycercus venustus</i>         | Northern Rosella         | PSITTACIFORMES   | Psittacidae       | 3 | 3 |
| <i>Plegadis falcinellus</i>         | Glossy Ibis              | CICONIIFORMES    | Threskiornithidae | 1 | 1 |
| <i>Plectorhyncha lanceolata</i>     | Striped Honeyeater       | PASSERIFORMES    | Meliphagidae      | 3 | 3 |
| <i>Podiceps cristatus</i>           | Great Crested Grebe      | PODICIPEDIFORMES | Podicipedidae     | 3 | 3 |
| <i>Podargus ocellatus</i>           | Marbled Frogmouth        | CAPRIMULGIFORMES | Podargidae        | 1 | 2 |
| <i>Podargus papuensis</i>           | Papuan Frogmouth         | CAPRIMULGIFORMES | Podargidae        | 2 | 3 |
| <i>Podargus strigoides</i>          | Tawny Frogmouth          | CAPRIMULGIFORMES | Podargidae        | 3 | 3 |
| <i>Poephila acuticauda</i>          | Long-tailed Finch        | PASSERIFORMES    | Estrildidae       | 3 | 3 |
| <i>Poecilodryas cerviniventris</i>  | Buff-sided Robin         | PASSERIFORMES    | Petroicidae       | 2 | 1 |
| <i>Poephila cincta</i>              | Black-throated Finch     | PASSERIFORMES    | Estrildidae       | 3 | 3 |
| <i>Poephila personata</i>           | Masked Finch             | PASSERIFORMES    | Estrildidae       | 1 | 1 |
| <i>Poecilodryas superciliosa</i>    | White-browed Robin       | PASSERIFORMES    | Petroicidae       | 2 | 2 |
| <i>Polytelis alexandrae</i>         | Princess Parrot          | PSITTACIFORMES   | Psittacidae       | 1 | 4 |
| <i>Polytelis anthopeplus</i>        | Regent Parrot            | PSITTACIFORMES   | Psittacidae       | 3 | 2 |
| <i>Poliocephalus poliocephalus</i>  | Hoary-headed Grebe       | PODICIPEDIFORMES | Podicipedidae     | 2 | 3 |
| <i>Polytelis swainsonii</i>         | Superb Parrot            | PSITTACIFORMES   | Psittacidae       | 2 | 3 |
| <i>Pomatostomus halli</i>           | Hall's Babbler           | PASSERIFORMES    | Pomatostomidae    | 2 | 2 |
| <i>Pomatostomus ruficeps</i>        | Chestnut-crowned Babbler | PASSERIFORMES    | Pomatostomidae    | 2 | 2 |
| <i>Pomatostomus superciliosus</i>   | White-browed Babbler     | PASSERIFORMES    | Pomatostomidae    | 3 | 3 |
| <i>Pomatostomus temporalis</i>      | Grey-crowned Babbler     | PASSERIFORMES    | Pomatostomidae    | 3 | 3 |
| <i>Porzana fluminea</i>             | Australian Spotted Crane | GRUIFORMES       | Rallidae          | 3 | 3 |
| <i>Porphyrio porphyrio</i>          | Purple Swamphen          | GRUIFORMES       | Rallidae          | 3 | 3 |
| <i>Porzana pusilla</i>              | Baillon's Crane          | GRUIFORMES       | Rallidae          | 2 | 3 |
| <i>Porzana tabuensis</i>            | Spotless Crane           | GRUIFORMES       | Rallidae          | 3 | 3 |
| <i>Probosciger aterrimus</i>        | Palm Cockatoo            | PSITTACIFORMES   | Cacatuidae        | 1 | 2 |
| <i>Psephotus chrysopterygius</i>    | Golden-shouldered Parrot | PSITTACIFORMES   | Psittacidae       | 1 | 1 |
| <i>Psephotus dissimilis</i>         | Hooded Parrot            | PSITTACIFORMES   | Psittacidae       | 1 | 3 |

|                                       |                           |                 |                       |   |   |
|---------------------------------------|---------------------------|-----------------|-----------------------|---|---|
| <i>Psephotus haematonotus</i>         | Red-rumped Parrot         | PSITTACIFORMES  | Psittacidae           | 3 | 3 |
| <i>Psephotus varius</i>               | Mulga Parrot              | PSITTACIFORMES  | Psittacidae           | 3 | 3 |
| <i>Psitteuteles versicolor</i>        | Varied Lorikeet           | PSITTACIFORMES  | Psittacidae           | 3 | 3 |
| <i>Psophodes cristatus</i>            | Chirruping Wedgebill      | PASSERIFORMES   | Psophodidae           | 2 | 1 |
| <i>Psophodes nigrogularis</i>         | Western Whipbird          | PASSERIFORMES   | Psophodidae           | 0 | 2 |
| <i>Psophodes occidentalis</i>         | Chiming Wedgebill         | PASSERIFORMES   | Psophodidae           | 1 | 1 |
| <i>Psophodes olivaceus</i>            | Eastern Whipbird          | PASSERIFORMES   | Psophodidae           | 3 | 3 |
| <i>Ptilonorhynchus cerviniventris</i> | Fawn-breasted Bowerbird   | PASSERIFORMES   | Ptilonorhynchid<br>ae | 2 | 1 |
| <i>Ptilinopus cinctus</i>             | Banded Fruit-Dove         | COLUMBIFORMES   | Columbidae            | 3 | 3 |
| <i>Ptilonorhynchus guttatus</i>       | Western Bowerbird         | PASSERIFORMES   | Ptilonorhynchid<br>ae | 3 | 3 |
| <i>Ptilonorhynchus maculatus</i>      | Spotted Bowerbird         | PASSERIFORMES   | Ptilonorhynchid<br>ae | 3 | 3 |
| <i>Ptiloris magnificus</i>            | Magnificent Riflebird     | PASSERIFORMES   | Paradisaeidae         | 1 | 3 |
| <i>Ptilonorhynchus nuchalis</i>       | Great Bowerbird           | PASSERIFORMES   | Ptilonorhynchid<br>ae | 2 | 3 |
| <i>Ptiloris paradiseus</i>            | Paradise Riflebird        | PASSERIFORMES   | Paradisaeidae         | 2 | 2 |
| <i>Ptilinopus regina</i>              | Rose-crowned Fruit-Dove   | COLUMBIFORMES   | Columbidae            | 3 | 3 |
| <i>Ptilinopus superbus</i>            | Superb Fruit-Dove         | COLUMBIFORMES   | Columbidae            | 2 | 3 |
| <i>Ptiloris victoriae</i>             | Victoria's Riflebird      | PASSERIFORMES   | Paradisaeidae         | 3 | 3 |
| <i>Ptilonorhynchus violaceus</i>      | Satin Bowerbird           | PASSERIFORMES   | Ptilonorhynchid<br>ae | 3 | 3 |
| <i>Ptilinopus magnificus</i>          | Wompoo Fruit-Dove         | COLUMBIFORMES   | Columbidae            | 2 | 3 |
| <i>Purnella albifrons</i>             | White-fronted Honeyeater  | PASSERIFORMES   | Meliphagidae          | 3 | 3 |
| <i>Purpureicephalus spurius</i>       | Red-capped Parrot         | PSITTACIFORMES  | Psittacidae           | 3 | 3 |
| <i>Pycnoptilus floccosus</i>          | Pilotbird                 | PASSERIFORMES   | Acanthizidae          | 1 | 1 |
| <i>Pyrrholaemus brunneus</i>          | Redthroat                 | PASSERIFORMES   | Acanthizidae          | 3 | 3 |
| <i>Rallina tricolor</i>               | Red-necked Crake          | GRUIFORMES      | Rallidae              | 2 | 3 |
| <i>Ramsayornis fasciatus</i>          | Bar-breasted Honeyeater   | PASSERIFORMES   | Meliphagidae          | 1 | 3 |
| <i>Ramsayornis modestus</i>           | Brown-backed Honeyeater   | PASSERIFORMES   | Meliphagidae          | 5 | 1 |
| <i>Recurvirostra novaehollandiae</i>  | Red-necked Avocet         | CHARADRIIFORMES | Recurvirostridae      | 1 | 3 |
| <i>Rhipidura albiscapa</i>            | Grey Fantail              | PASSERIFORMES   | Rhipiduridae          | 3 | 3 |
| <i>Rhipidura dryas</i>                | Arafura Fantail           | PASSERIFORMES   | Rhipiduridae          | 3 | 6 |
| <i>Rhipidura leucophrys</i>           | Willie Wagtail            | PASSERIFORMES   | Rhipiduridae          | 3 | 3 |
| <i>Rhipidura phasiana</i>             | Mangrove Grey Fantail     | PASSERIFORMES   | Rhipiduridae          | 3 | 2 |
| <i>Rhipidura rufifrons</i>            | Rufous Fantail            | PASSERIFORMES   | Rhipiduridae          | 2 | 3 |
| <i>Rhipidura rufiventris</i>          | Northern Fantail          | PASSERIFORMES   | Rhipiduridae          | 3 | 3 |
| <i>Rostratula australis</i>           | Australian Painted Snipe  | CHARADRIIFORMES | Rostratulidae         | 3 | 3 |
| <i>Scenopoeetes dentirostris</i>      | Tooth-billed Bowerbird    | PASSERIFORMES   | Ptilonorhynchid<br>ae | 3 | 3 |
| <i>Scythrops novaehollandiae</i>      | Channel-billed Cuckoo     | CUCULIFORMES    | Cuculidae             | 2 | 2 |
| <i>Sericornis beccarii</i>            | Tropical Scrubwren        | PASSERIFORMES   | Acanthizidae          | 1 | 2 |
| <i>Sericulus chrysocephalus</i>       | Regent Bowerbird          | PASSERIFORMES   | Ptilonorhynchid<br>ae | 6 | 6 |
| <i>Sericornis citreogularis</i>       | Yellow-throated Scrubwren | PASSERIFORMES   | Acanthizidae          | 3 | 1 |
| <i>Sericornis frontalis</i>           | White-browed Scrubwren    | PASSERIFORMES   | Acanthizidae          | 3 | 3 |
| <i>Sericornis humilis</i>             | Tasmanian Scrubwren       | PASSERIFORMES   | Acanthizidae          | 3 | 3 |
| <i>Sericornis kerri</i>               | Atherton Scrubwren        | PASSERIFORMES   | Acanthizidae          | 2 | 2 |
| <i>Sericornis magnirostra</i>         | Large-billed Scrubwren    | PASSERIFORMES   | Acanthizidae          | 3 | 3 |
| <i>Smicronis brevirostris</i>         | Weebill                   | PASSERIFORMES   | Acanthizidae          | 3 | 3 |

|                                      |                                   |                  |                   |   |   |
|--------------------------------------|-----------------------------------|------------------|-------------------|---|---|
| <i>Sphecotheres vieilloti</i>        | Australasian Figbird              | PASSERIFORMES    | Oriolidae         | 3 | 3 |
| <i>Stagonopleura bella</i>           | Beautiful Firetail                | PASSERIFORMES    | Estrildidae       | 1 | 3 |
| <i>Stagonopleura guttata</i>         | Diamond Firetail                  | PASSERIFORMES    | Estrildidae       | 3 | 3 |
| <i>Stagonopleura oculata</i>         | Red-eared Firetail                | PASSERIFORMES    | Estrildidae       | 1 | 2 |
| <i>Sternula albifrons</i>            | Little Tern                       | CHARADRIIFORMES  | Laridae           | 2 | 1 |
| <i>Sternula nereis</i>               | Fairy Tern                        | CHARADRIIFORMES  | Laridae           | 2 | 2 |
| <i>Sterna striata</i>                | White-fronted Tern                | CHARADRIIFORMES  | Laridae           | 0 | 2 |
| <i>Sterna sumatrana</i>              | Black-naped Tern                  | CHARADRIIFORMES  | Laridae           | 2 | 3 |
| <i>Stiltia isabella</i>              | Australian Pratincole             | CHARADRIIFORMES  | Glareolidae       | 1 | 1 |
| <i>Stipiturus malachurus</i>         | Southern Emu-wren                 | PASSERIFORMES    | Maluridae         | 2 | 3 |
| <i>Stipiturus mallee</i>             | Mallee Emu-wren                   | PASSERIFORMES    | Maluridae         | 3 | 3 |
| <i>Stictonetta naevosa</i>           | Freckled Duck                     | ANSERIFORMES     | Anatidae          | 3 | 3 |
| <i>Stipiturus ruficeps</i>           | Rufous-crowned Emu-wren           | PASSERIFORMES    | Maluridae         | 3 | 3 |
| <i>Struthidea cinerea</i>            | Apostlebird                       | PASSERIFORMES    | Corcoracidae      | 3 | 3 |
| <i>Strepera fuliginosa</i>           | Black Currawong                   | PASSERIFORMES    | Artamidae         | 3 | 1 |
| <i>Strepera graculina</i>            | Pied Currawong                    | PASSERIFORMES    | Artamidae         | 2 | 3 |
| <i>Strepera versicolor</i>           | Grey Currawong                    | PASSERIFORMES    | Artamidae         | 3 | 3 |
| <i>Sugomel niger</i>                 | Black Honeyeater                  | PASSERIFORMES    | Meliphagidae      | 1 | 3 |
| <i>Syma torotoro</i>                 | Yellow-billed Kingfisher          | CORACIIFORMES    | Halcyonidae       | 1 | 1 |
| <i>Symposiachrus trivirgatus</i>     | Spectacled Monarch                | PASSERIFORMES    | Monarchidae       | 1 | 1 |
| <i>Tachybaptus novaehollandiae</i>   | Australasian Grebe                | PODICIPEDIFORMES | Podicipedidae     | 3 | 3 |
| <i>Tadorna radjah</i>                | Radjah Shelduck                   | ANSERIFORMES     | Anatidae          | 1 | 1 |
| <i>Tadorna tadornoides</i>           | Australian Shelduck               | ANSERIFORMES     | Anatidae          | 3 | 2 |
| <i>Taeniopygia bichenovii</i>        | Double-barred Finch               | PASSERIFORMES    | Estrildidae       | 2 | 3 |
| <i>Taeniopygia guttata</i>           | Zebra Finch                       | PASSERIFORMES    | Estrildidae       | 3 | 3 |
| <i>Tanysiptera sylvia</i>            | Buff-breasted Paradise-Kingfisher | CORACIIFORMES    | Halcyonidae       | 3 | 3 |
| <i>Thalasseus bengalensis</i>        | Lesser Crested Tern               | CHARADRIIFORMES  | Laridae           | 0 | 1 |
| <i>Thalasseus bergii</i>             | Crested Tern                      | CHARADRIIFORMES  | Laridae           | 1 | 3 |
| <i>Thinornis rubricollis</i>         | Hooded Plover                     | CHARADRIIFORMES  | Charadriidae      | 3 | 3 |
| <i>Threskiornis molucca</i>          | Australian White Ibis             | CICONIIFORMES    | Threskiornithidae | 2 | 2 |
| <i>Threskiornis spinicollis</i>      | Straw-necked Ibis                 | CICONIIFORMES    | Threskiornithidae | 2 | 3 |
| <i>Todiramphus chloris</i>           | Collared Kingfisher               | CORACIIFORMES    | Halcyonidae       | 1 | 3 |
| <i>Todiramphus macleayii</i>         | Forest Kingfisher                 | CORACIIFORMES    | Halcyonidae       | 3 | 3 |
| <i>Todiramphus pyrrhopygius</i>      | Red-backed Kingfisher             | CORACIIFORMES    | Halcyonidae       | 3 | 3 |
| <i>Todiramphus sanctus</i>           | Sacred Kingfisher                 | CORACIIFORMES    | Halcyonidae       | 3 | 3 |
| <i>Tregellasia capito</i>            | Pale-yellow Robin                 | PASSERIFORMES    | Petroicidae       | 2 | 2 |
| <i>Tregellasia leucops</i>           | White-faced Robin                 | PASSERIFORMES    | Petroicidae       | 2 | 3 |
| <i>Trichoglossus chlorolepidotus</i> | Scaly-breasted Lorikeet           | PSITTACIFORMES   | Psittacidae       | 3 | 2 |
| <i>Trichodere cockerelli</i>         | White-streaked Honeyeater         | PASSERIFORMES    | Meliphagidae      | 1 | 2 |
| <i>Trichoglossus haematodus</i>      | Rainbow Lorikeet                  | PSITTACIFORMES   | Psittacidae       | 3 | 3 |
| <i>Tribonyx mortierii</i>            | Tasmanian Native-hen              | GRUIFORMES       | Rallidae          | 3 | 3 |
| <i>Tribonyx ventralis</i>            | Black-tailed Native-hen           | GRUIFORMES       | Rallidae          | 2 | 2 |
| <i>Turnix castanotus</i>             | Chestnut-backed Button-quail      | CHARADRIIFORMES  | Turnicidae        | 3 | 3 |
| <i>Turnix maculosus</i>              | Red-backed Button-quail           | CHARADRIIFORMES  | Turnicidae        | 2 | 2 |
| <i>Turnix melanogaster</i>           | Black-breasted Button-quail       | CHARADRIIFORMES  | Turnicidae        | 2 | 1 |

|                              |                            |                 |              |   |   |
|------------------------------|----------------------------|-----------------|--------------|---|---|
| <i>Turnix olivii</i>         | Buff-breasted Button-quail | CHARADRIIFORMES | Turnicidae   | 3 | 1 |
| <i>Turnix pyrrhоторax</i>    | Red-chested Button-quail   | CHARADRIIFORMES | Turnicidae   | 3 | 3 |
| <i>Turnix varius</i>         | Painted Button-quail       | CHARADRIIFORMES | Turnicidae   | 3 | 3 |
| <i>Turnix velox</i>          | Little Button-quail        | CHARADRIIFORMES | Turnicidae   | 1 | 2 |
| <i>Tyto javanica</i>         | Eastern Barn Owl           | STRIGIFORMES    | Tytonidae    | 3 | 3 |
| <i>Tyto longimembris</i>     | Eastern Grass Owl          | STRIGIFORMES    | Tytonidae    | 2 | 1 |
| <i>Tyto novaehollandiae</i>  | Masked Owl                 | STRIGIFORMES    | Tytonidae    | 3 | 1 |
| <i>Tyto tenebricosa</i>      | Sooty Owl                  | STRIGIFORMES    | Tytonidae    | 3 | 1 |
| <i>Vanellus miles</i>        | Masked Lapwing             | CHARADRIIFORMES | Charadriidae | 3 | 3 |
| <i>Vanellus tricolor</i>     | Banded Lapwing             | CHARADRIIFORMES | Charadriidae | 2 | 3 |
| <i>Xanthotis flaviventer</i> | Tawny-breasted Honeyeater  | PASSERIFORMES   | Meliphagidae | 1 | 4 |
| <i>Xanthotis macleayanus</i> | Macleay's Honeyeater       | PASSERIFORMES   | Meliphagidae | 2 | 3 |
| <i>Zoothera heinei</i>       | Russet-tailed Thrush       | PASSERIFORMES   | Turdidae     | 1 | 2 |
| <i>Zoothera lunulata</i>     | Bassian Thrush             | PASSERIFORMES   | Turdidae     | 3 | 3 |
| <i>Zosterops citrinella</i>  | Pale White-eye             | PASSERIFORMES   | Timaliidae   | 3 | 0 |
| <i>Zosterops lateralis</i>   | Silveryeye                 | PASSERIFORMES   | Timaliidae   | 3 | 3 |
| <i>Zosterops luteus</i>      | Yellow White-eye           | PASSERIFORMES   | Timaliidae   | 1 | 2 |

### 3D grid in visual space

**Figure S2.** A graphical representation of the process of three-dimensional 'rasterization' of visual space. Each cube in the figure represents a chromatic locus. 'Shadows' on the bottom and side panels are those used in Figs. 1-3 to represent three-dimensional chromatic variation in two dimensions (see text for more details).

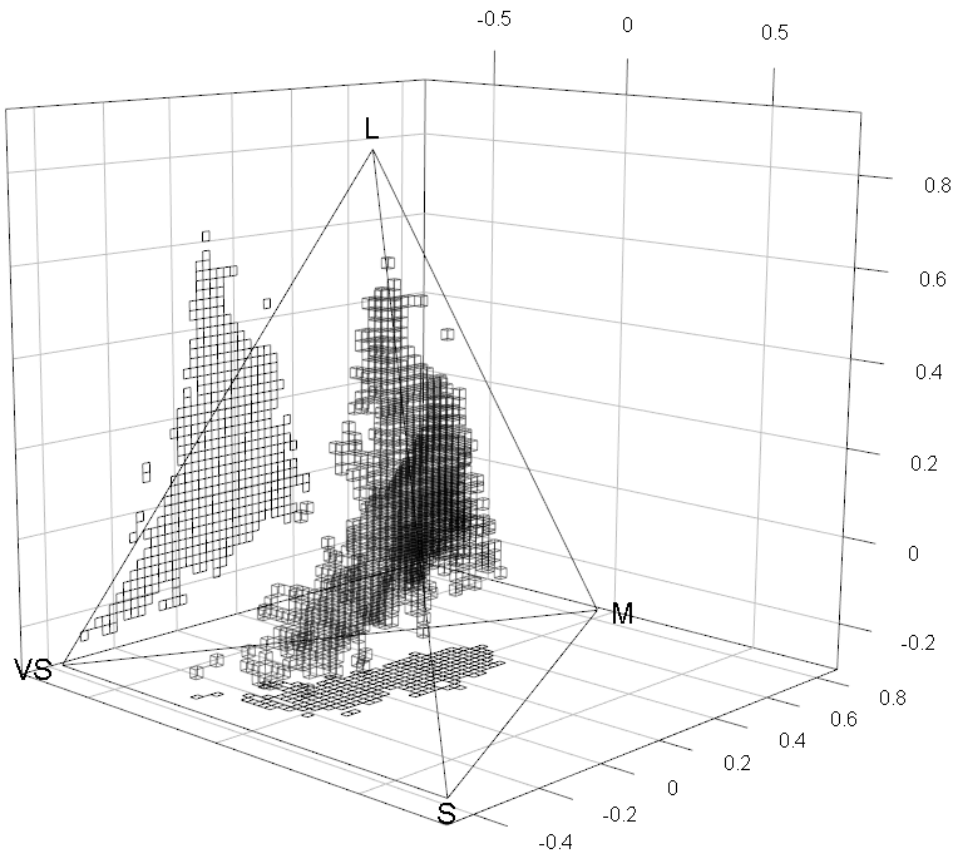



## Examples of reflectance spectra

**Figure S3.** Examples of reflectance spectra classified as melanin-based. Wing scapulars of *Malurus pulcherrimus* male (red), upper back of *Arses telescopthalmus* male (black), upper back *Chroicocephalus novaehollandiae* male (grey), crown *Chroicocephalus novaehollandiae* male (black dashed), belly *Stipiturus malachurus* male (orange) and belly *Malurus melanocephalus* male (thin black).

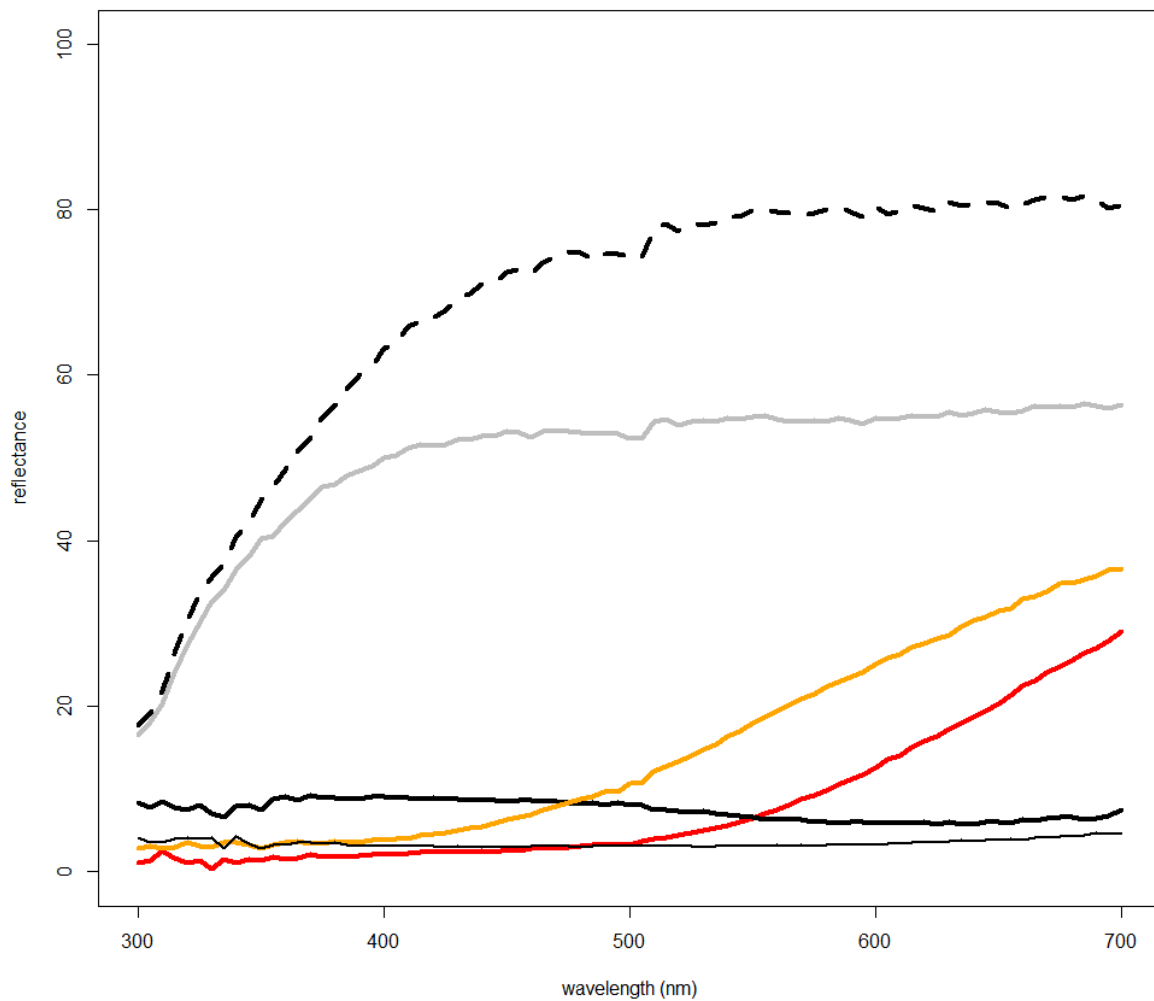

**Figure S4.** Examples of reflectance spectra classified as carotenoid-based. Cheek of *Stagonopleura oculata* female (red), ventral neck of *Machaerirhynchus flaviventer* (yellow), crown of *Ptilinopus superbis* male (purple), rump of *Acanthiza reguloides* (blue), breast of *Petroica rodinogaster* male (pink), front of *Sericulus chrysocephalus* male (orange).

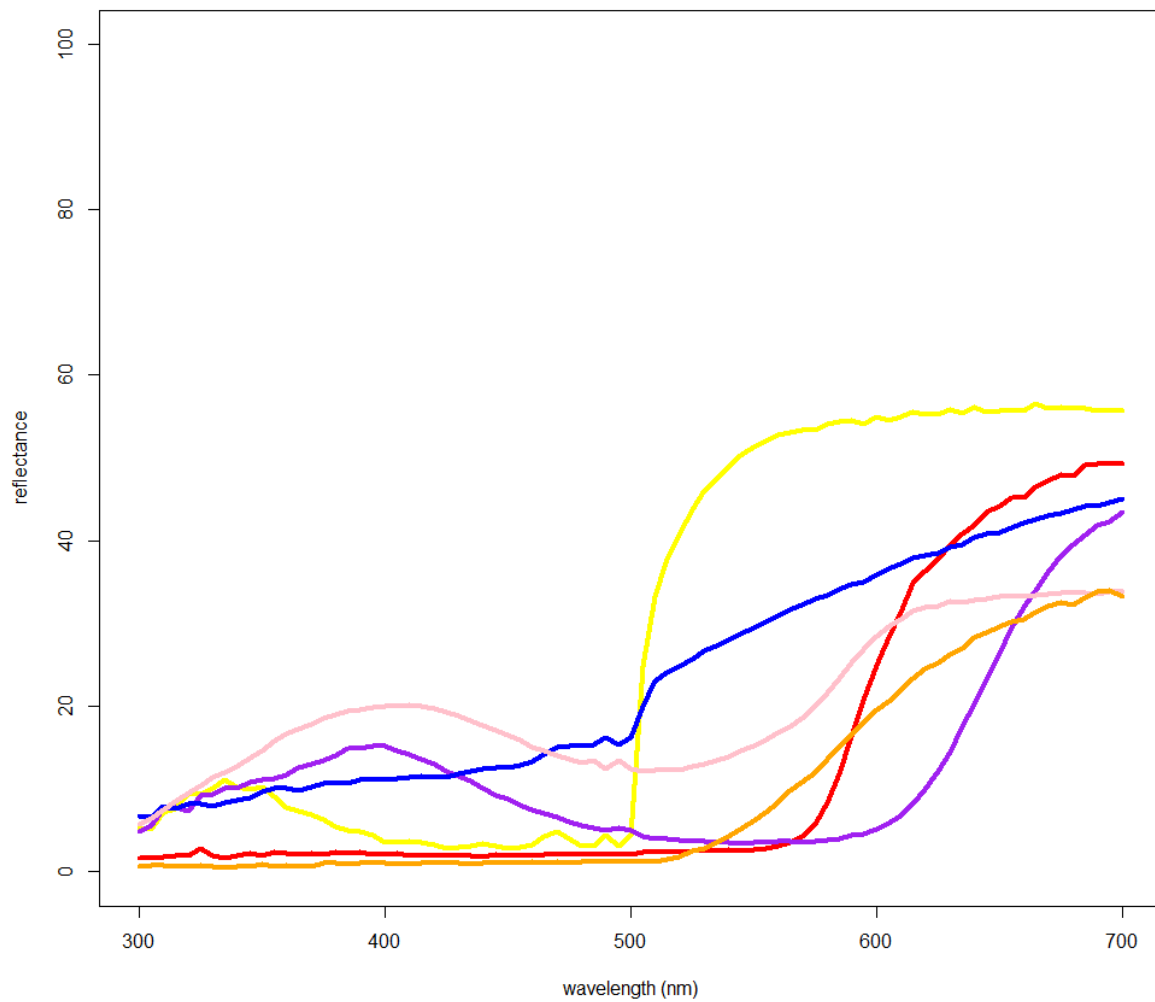

**Figure S5.** Examples of reflectance spectra classified as psittacofulvin-based. Front of *Platycercus caledonicus* male (red), neck of *Eolophus roseicapillus* (pink), wing scapulars of *Psephotus varius* male (orange), breast of *Neopsephotus bourkii* male (pink dashed), cheek of *Calyptorhynchus funereus* male (yellow) and cheek of *Cacatua galerita* male (yellow dashed).

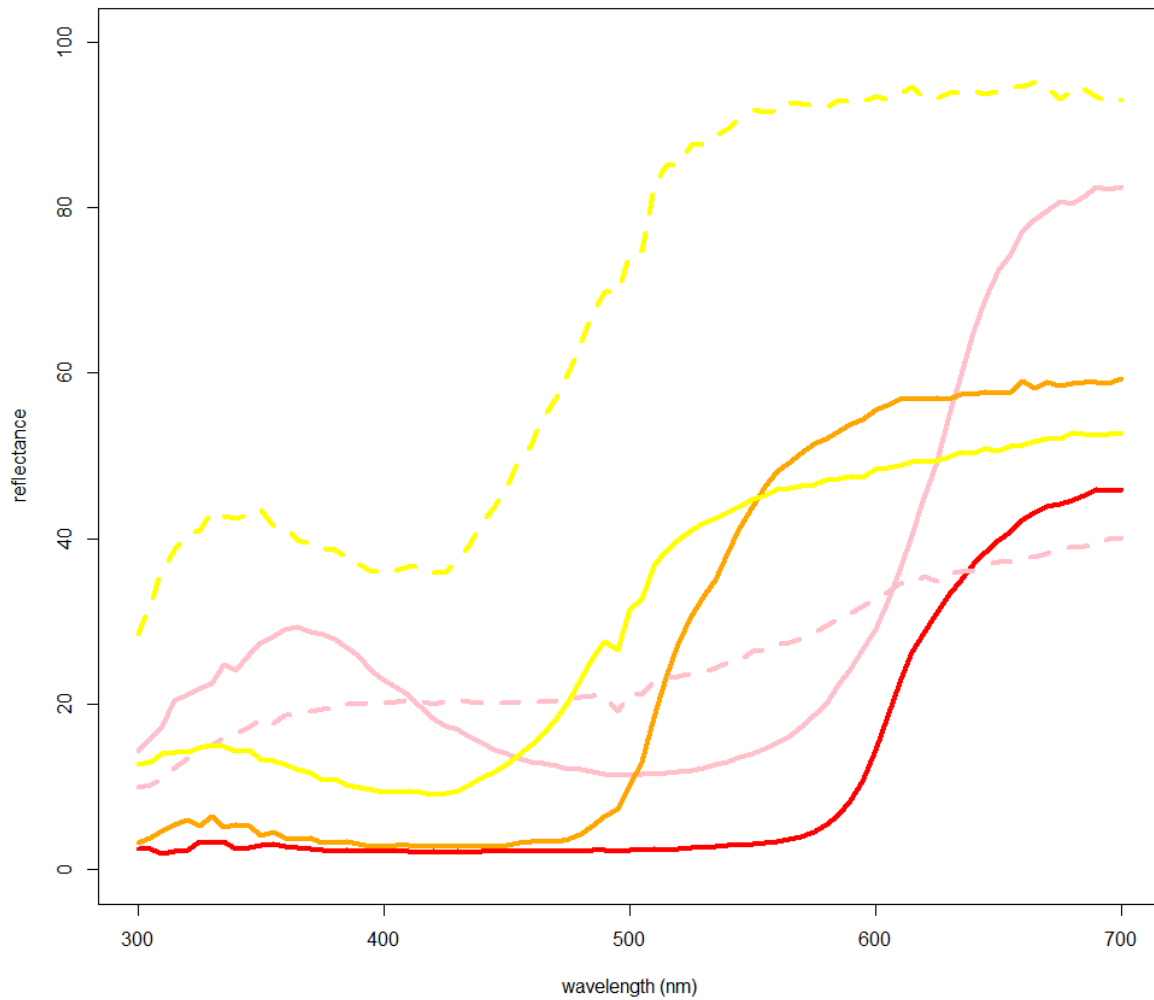

**Figure S6. Examples of reflectance spectra classified as structural.** Wing scapulars of female *Phaps chalcoptera* (red), upper breast of male *Malurus splendens* (cyan), upper back male *Chalcophaps indica* (green), upper back female *Threskiornis spinicollis* (black), lower back of male *Nettapus pulchellus* (dark green), upper back of male *Aplonis metallica* (black dashed), upper breast male *Erythrura gouldiae* (purple).

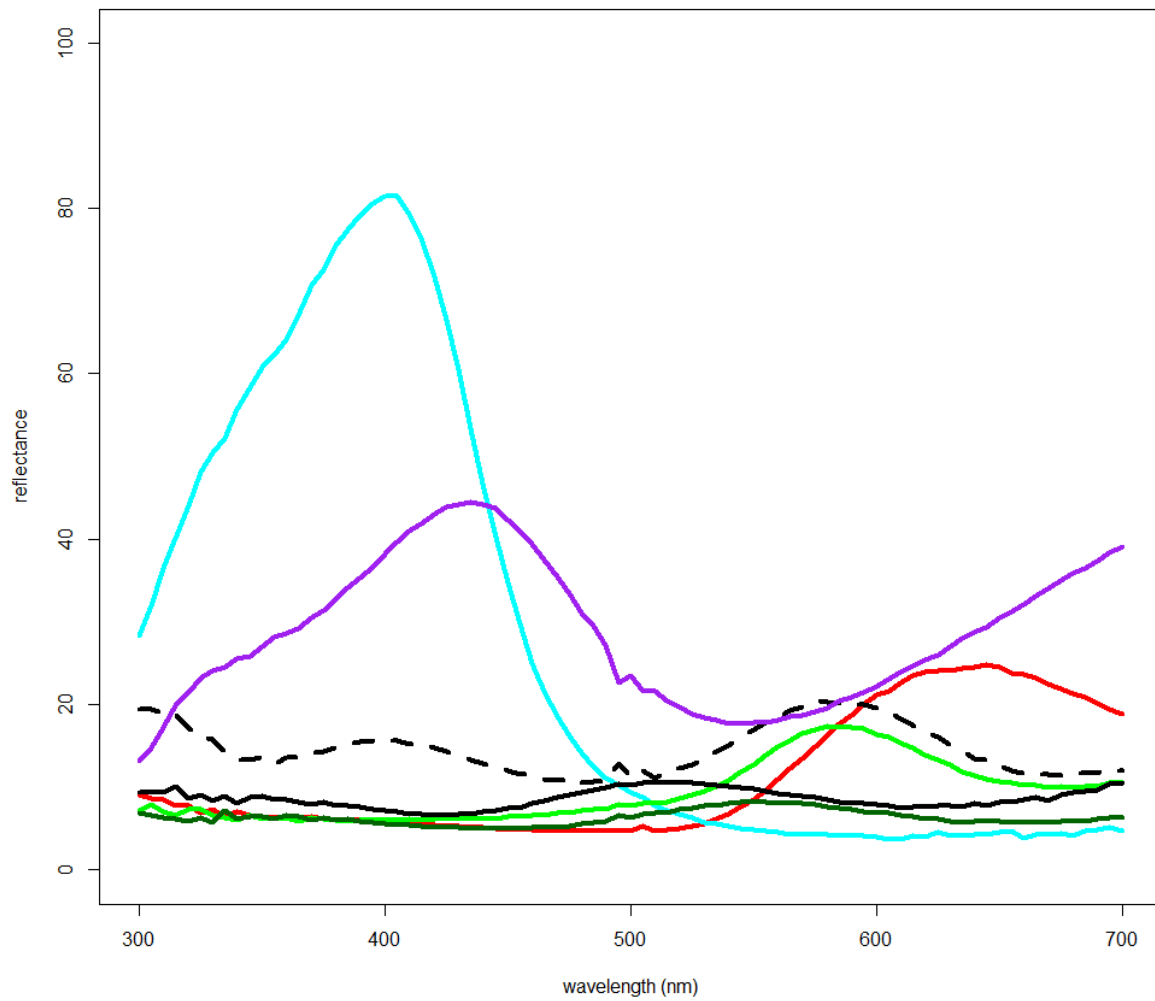

**Figure S7.** Examples of reflectance spectra classified as carotenoids+structure. Ventral neck of *Erythrura trichroa* female (green), rump of *Ailuroedus crassirostris* male (green dashed), upper back of *Ptilinopus superbis* female (dark green) and front of *Merops ornatus* male (black). Note that some subtle aspects of spectral shape (absorption peaks at around 450 nm) cannot be appreciated at this scale for darker spectra.

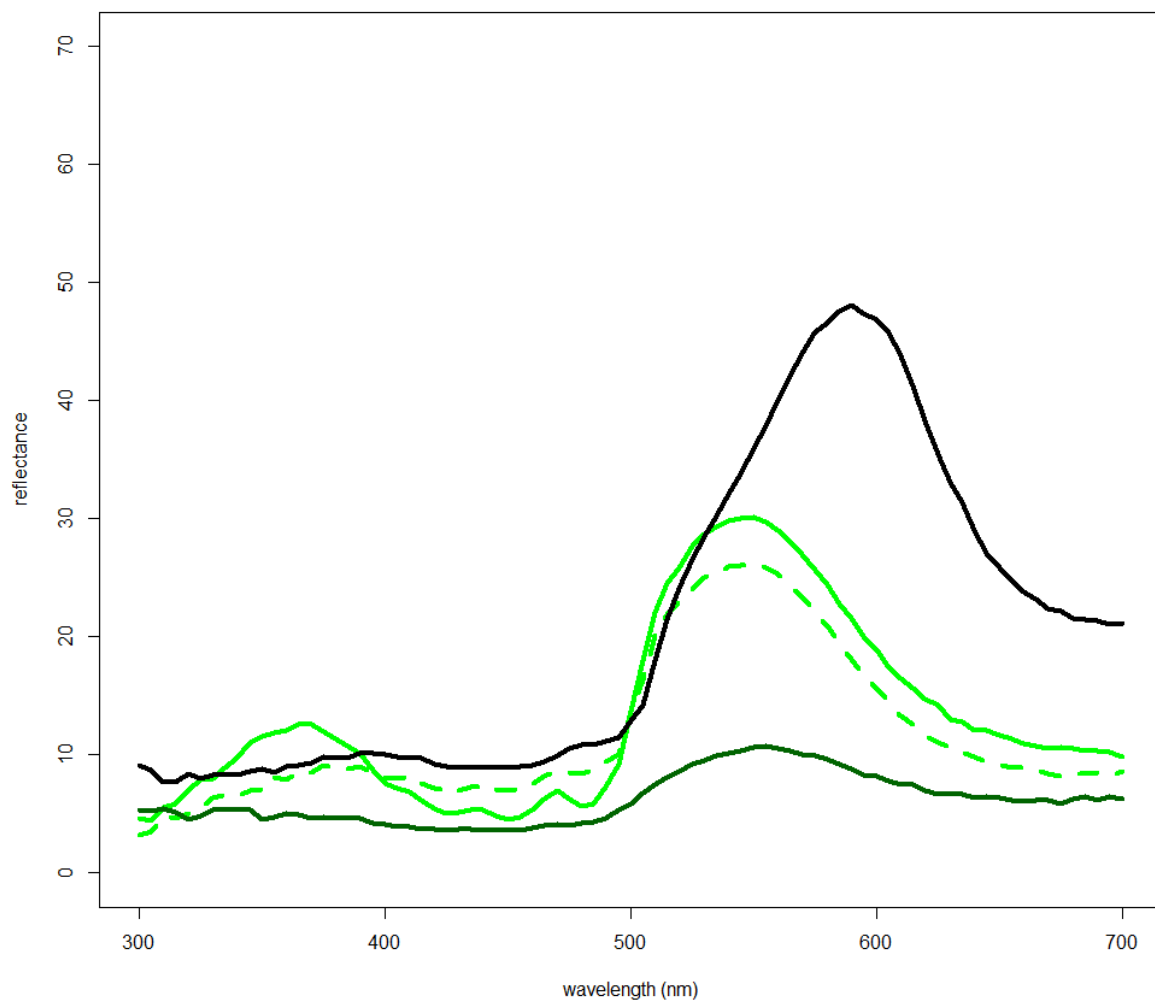

**Figure S8.** Examples of reflectance spectra classified as psittacofulvins+structure. Cheek of male *Aprosmictus erythropterus* (green), lower breast of female *Melopsittacus undulatus* (dark green) and crown of male *Electus roratus* (black).

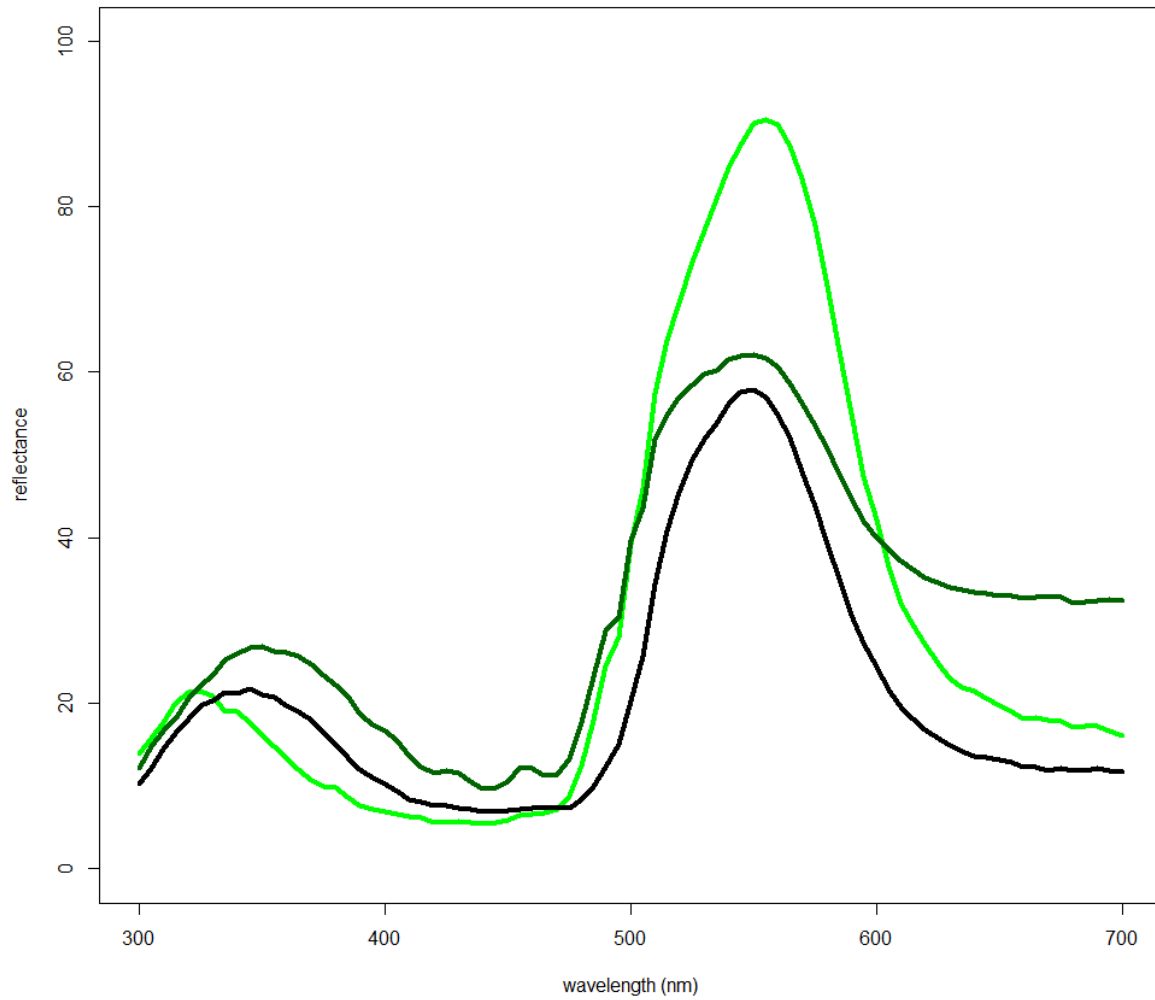

## Summary of results for V-type visual systems

The total volume occupied by Australian landbirds modelled using V-type visual sensitivities was 0.055, or 16% of the total theoretical avian colour space. Similar to U-type eyes most colours were concentrated in the centre of the visual space.

### Colour production mechanisms

**Table S2. Colour space occupation by the main colour-production mechanisms in birds.**

|                           | % of total<br>volume | % of total<br>chromatic loci | % of unique<br>chromatic loci |
|---------------------------|----------------------|------------------------------|-------------------------------|
| Melanins                  | 4.2                  | 16.3                         | 5.8                           |
| Carotenoids               | 18.8                 | 22.8                         | 10.7                          |
| Psittacofulvins           | 13.3                 | 23.1                         | 11.1                          |
| Structural                | 43.8                 | 39.9                         | 28.5                          |
| Carotenoids+structure     | 2.6                  | 10.3                         | 1.8                           |
| Psittacofulvins+structure | 18.2                 | 28                           | 16.1                          |

### Sex differences

The total volume of chromatic space occupied by males was 0.054 and by females 0.031. This corresponds to 98% and 55.5% of the total chromatic volume of the sample. The overlap in convex hull volume between the sexes comprises 99% of female- and 56% of male-occupied volume. In terms of chromatic loci females occupy 59% and males 79% of all chromatic loci; 39% of occupied loci are shared by the sexes, 21% are restricted to females and 40% to males. Bootstrapping confirms that males occupy larger portions of the chromatic space than females (bootstrapped ratio female/male volume, median = 0.56, 2.5% quantile = 0.39, 97.5% quantile = 0.75; ratio female/male occupied chromatic loci: median = 0.77, 2.5% quantile = 0.73, 97.5% quantile = 0.81).

### Taxonomic differences

The orders Passeriformes and Psittaciformes occupy the largest proportion of the colours space (>70% of volume and > 50% of chromatic loci). However, only Psittaciformes show higher values than expected for their number of species (Supplementary Tables S3 and S4). Most orders show expected or lower than expected levels of occupation of the visual space. The only exception was

the order Coraciiformes (>10% of colour volume and >14% of chromatic loci) which had higher levels than expected (see Supplementary Tables S3 and S4).



**Table S3.** Comparing observed values of male colour diversity (computed for V-type visual system) for each bird order (% occupied convex hull volume and chromatic loci) with the expected values obtained from bootstrapping the same number of random species from the entire sample of male colours. P-values are two-tailed and represent the proportion of bootstrapped values more extreme than the observed value.

| ORDER                   | n   | % of male convex hull volume |                         |                          |         | % of male occupied chromatic loci |                         |                          |         |
|-------------------------|-----|------------------------------|-------------------------|--------------------------|---------|-----------------------------------|-------------------------|--------------------------|---------|
|                         |     | observed                     | 2.5% quantile bootstrap | 97.5% quantile bootstrap | p-value | observed                          | 2.5% quantile bootstrap | 97.5% quantile bootstrap | p-value |
| 1 ACCIPITRIFORMES       | 18  | 0.005                        | 0.018                   | 0.398                    | <0.001  | 0.057                             | 0.068                   | 0.147                    | 0.001   |
| 2 ANSERIFORMES          | 18  | 0.030                        | 0.018                   | 0.398                    | 0.033   | 0.081                             | 0.068                   | 0.147                    | 0.062   |
| 3 APODIFORMES           | 2   | <0.001                       | <0.001                  | 0.107                    | 0.125   | 0.016                             | 0.012                   | 0.034                    | 0.087   |
| 4 CAPRIMULGIFORMES      | 6   | <0.001                       | 0.001                   | 0.207                    | <0.001  | 0.028                             | 0.031                   | 0.075                    | 0.006   |
| 5 CASUARIIFORMES        | 1   | <0.001                       | <0.001                  | 0.052                    | 0.003   | 0.004                             | 0.005                   | 0.020                    | 0.003   |
| 6 CHARADRIIFORMES       | 35  | 0.003                        | 0.073                   | 0.546                    | <0.001  | 0.066                             | 0.112                   | 0.215                    | <0.001  |
| 7 CICONIIFORMES         | 35  | 0.012                        | 0.014                   | 0.378                    | 0.009   | 0.070                             | 0.064                   | 0.136                    | 0.035   |
| 8 COLUMBIFORMES         | 22  | 0.077                        | 0.030                   | 0.441                    | 0.080   | 0.110                             | 0.079                   | 0.165                    | 0.179   |
| 9 CORACIIFORMES         | 12  | 0.109                        | 0.008                   | 0.321                    | 0.192   | 0.141                             | 0.051                   | 0.116                    | 0.001   |
| 10 CUCULIFORMES         | 10  | 0.009                        | 0.005                   | 0.286                    | 0.041   | 0.051                             | 0.044                   | 0.103                    | 0.050   |
| 11 FALCONIFORMES        | 6   | 0.001                        | 0.001                   | 0.207                    | 0.001   | 0.034                             | 0.031                   | 0.075                    | 0.039   |
| 12 GALLIFORMES          | 6   | 0.001                        | 0.001                   | 0.207                    | 0.008   | 0.029                             | 0.031                   | 0.075                    | 0.009   |
| 13 GRUIFORMES           | 16  | 0.028                        | 0.014                   | 0.378                    | 0.042   | 0.065                             | 0.064                   | 0.136                    | 0.017   |
| 14 PASSERIFORMES        | 305 | 0.738                        | 0.533                   | 0.938                    | 0.234   | 0.509                             | 0.509                   | 0.670                    | 0.013   |
| 15 PHALACROCORACIFORMES | 6   | 0.001                        | 0.001                   | 0.207                    | 0.004   | 0.023                             | 0.031                   | 0.075                    | 0.001   |
| 16 PODICIPEDIFORMES     | 3   | 0.001                        | 0.000                   | 0.132                    | 0.057   | 0.016                             | 0.017                   | 0.046                    | 0.007   |
| 17 PSITTACIFORMES       | 49  | 0.730                        | 0.133                   | 0.630                    | 0.002   | 0.529                             | 0.144                   | 0.263                    | 0.000   |
| 18 STRIGIFORMES         | 8   | 0.001                        | 0.003                   | 0.257                    | 0.002   | 0.040                             | 0.038                   | 0.089                    | 0.025   |

**Table S4.** Comparing observed values of female colour diversity (computed for V-type visual system) for each bird order (% occupied convex hull volume and

chromatic loci) with the expected values obtained from bootstrapping the same number of random species from the entire sample of female colours. P-values are two-tailed and represent the proportion of bootstrapped values more extreme than the observed value.

|    | Order                | n   | % of female convex hull volume |                         |                          |         | % of female occupied chromatic loci |                         |                          |         |
|----|----------------------|-----|--------------------------------|-------------------------|--------------------------|---------|-------------------------------------|-------------------------|--------------------------|---------|
|    |                      |     | observed                       | 2.5% quantile bootstrap | 97.5% quantile bootstrap | p-value | observed                            | 2.5% quantile bootstrap | 97.5% quantile bootstrap | p-value |
| 1  | ACCIPITRIFORMES      | 18  | 0.006                          | 0.019                   | 0.379                    | <0.001  | 0.078                               | 0.087                   | 0.178                    | 0.004   |
| 2  | ANSERIFORMES         | 18  | 0.050                          | 0.019                   | 0.379                    | 0.098   | 0.087                               | 0.087                   | 0.178                    | 0.014   |
| 3  | APODIFORMES          | 2   | 0.001                          | <0.001                  | 0.086                    | 0.097   | 0.023                               | 0.016                   | 0.044                    | 0.123   |
| 4  | CAPRIMULGIFORMES     | 6   | 0.001                          | 0.002                   | 0.201                    | 0.002   | 0.039                               | 0.041                   | 0.095                    | 0.010   |
| 5  | CASUARIIFORMES       | 1   | <0.001                         | <0.001                  | 0.032                    | 0.003   | 0.005                               | 0.008                   | 0.025                    | 0.005   |
| 6  | CHARADRIIFORMES      | 35  | 0.009                          | 0.062                   | 0.546                    | <0.001  | 0.111                               | 0.134                   | 0.258                    | 0.001   |
| 7  | CICONIIFORMES        | 35  | 0.025                          | 0.016                   | 0.356                    | 0.042   | 0.083                               | 0.080                   | 0.167                    | 0.023   |
| 8  | COLUMBIFORMES        | 22  | 0.081                          | 0.026                   | 0.414                    | 0.126   | 0.144                               | 0.098                   | 0.201                    | 0.254   |
| 9  | CORACIIFORMES        | 12  | 0.153                          | 0.009                   | 0.293                    | 0.091   | 0.163                               | 0.065                   | 0.144                    | 0.002   |
| 10 | CUCULIFORMES         | 10  | 0.013                          | 0.006                   | 0.256                    | 0.056   | 0.057                               | 0.057                   | 0.129                    | 0.013   |
| 11 | FALCONIFORMES        | 6   | 0.002                          | 0.002                   | 0.201                    | 0.012   | 0.052                               | 0.041                   | 0.095                    | 0.114   |
| 12 | GALLIFORMES          | 6   | 0.001                          | 0.002                   | 0.201                    | 0.001   | 0.041                               | 0.041                   | 0.095                    | 0.016   |
| 13 | GRUIFORMES           | 16  | 0.034                          | 0.016                   | 0.356                    | 0.069   | 0.087                               | 0.080                   | 0.167                    | 0.034   |
| 14 | PASSERIFORMES        | 305 | 0.347                          | 0.507                   | 0.942                    | <0.001  | 0.456                               | 0.536                   | 0.706                    | <0.001  |
| 15 | PHALACROCORACIFORMES | 6   | 0.001                          | 0.002                   | 0.201                    | 0.001   | 0.028                               | 0.041                   | 0.095                    | <0.001  |
| 16 | PODICIPEDIFORMES     | 3   | 0.001                          | <0.001                  | 0.130                    | 0.032   | 0.021                               | 0.025                   | 0.059                    | 0.006   |
| 17 | PSITTACIFORMES       | 49  | 0.827                          | 0.100                   | 0.624                    | <0.001  | 0.609                               | 0.168                   | 0.307                    | <0.001  |
| 18 | STRIGIFORMES         | 8   | 0.001                          | 0.004                   | 0.243                    | <0.001  | 0.042                               | 0.051                   | 0.114                    | 0.002   |
